# Supplementary material for: Genome and single-cell RNA-sequencing of the earthworm Eisenia andrei identifies cellular mechanisms underlying regeneration
Source: PubMed Central journal article supplement (PMC7253469; doi:10.1038/s41467-020-16454-8), 2020-05-27
Supplement: 41467_2020_16454_MOESM1_ESM.pdf [file 41467_2020_16454_MOESM1_ESM.pdf]

## **Supplementary Information**

**The Earthworm *Eisenia andrei* Genome and Single-cell RNA-Sequencing  
Reveal Molecular and Cellular Mechanisms underlying Regeneration**

Shao, Wang, Zhang, Li et al.

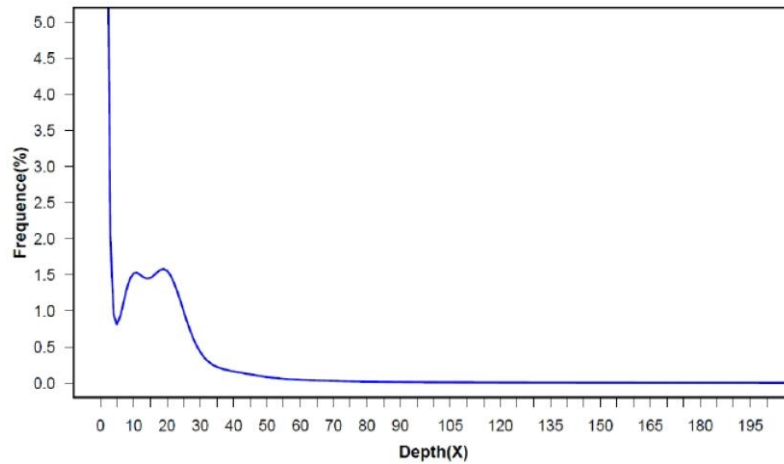

**Supplementary Figure 1 | Genome size of the earthworm estimated from 17 k-mers using 34.7Gb next generation sequencing reads.** In detail, K-mer=17, kmer num=25,536,306,648, k-mer depth=20, genome size=1,276,815,332bp and coverage (X)=24.

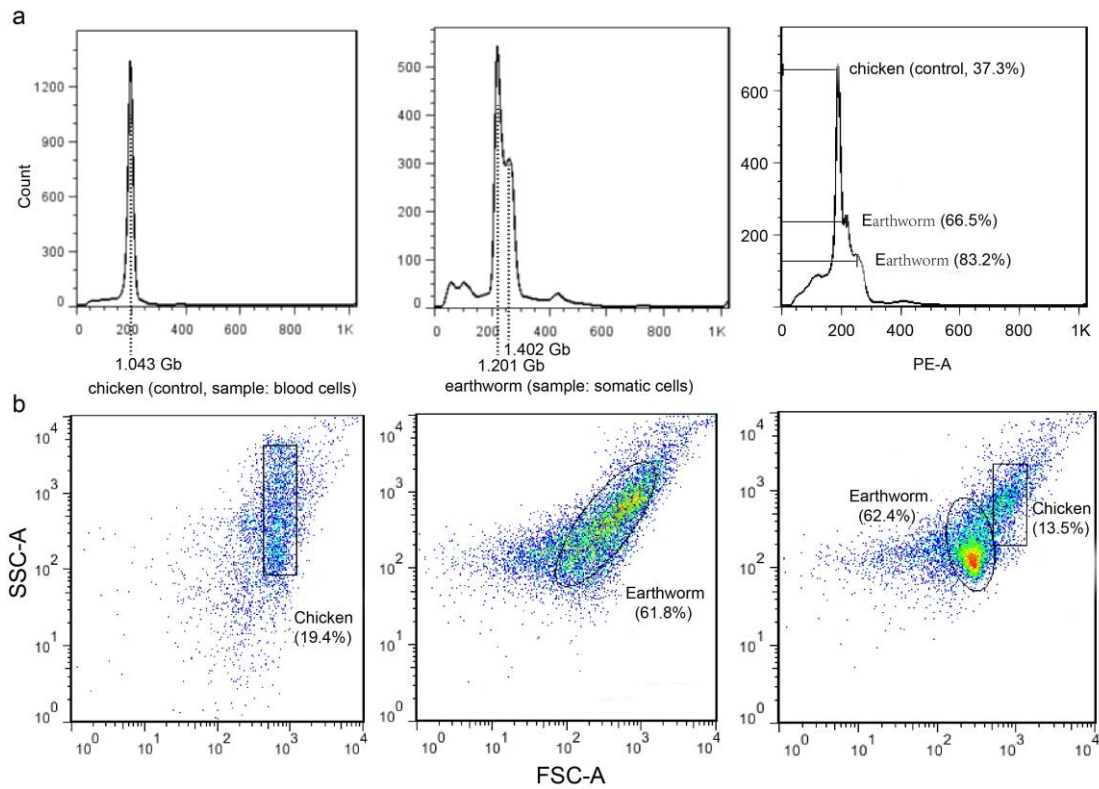

**Supplementary Figure 2 | Evaluation of genome size for the earthworm using flow cytometry.** The different data plotting styles were showed to measure genome size of earthworm. **a**, Flow cytometry histograms of the earthworm somatic cell samples and chicken blood cells obtained by PI fluorescence dye excitation and counts representing the cell population. **b**, Flow cytometry scatter plots. The gating strategy was decided by the empirical balance between relative size of the cells and the granularity. The domesticated chicken was utilized as a control with the known genome size (*Gallus gallus*, GRCg6a: 1.043 Gb).

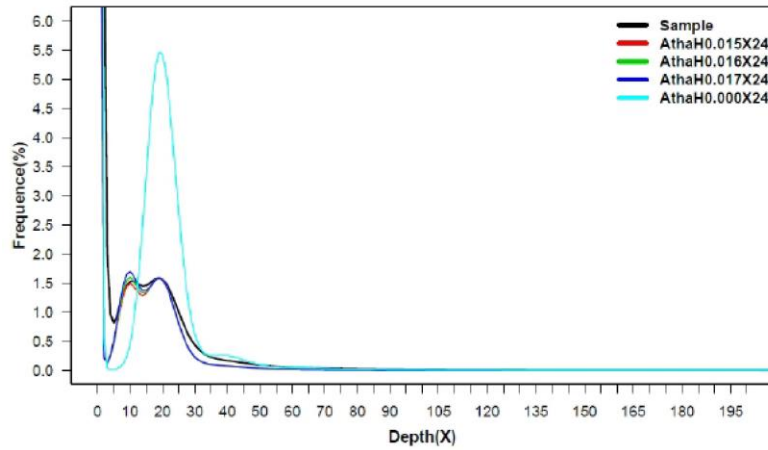

**Supplementary Figure 3 | Simulated heterozygosity curve for earthworm.** The x axis shows k-mer depth (X), and y axis exhibits k-mer depth frequency. The AthaH0.015X24 simulation shows the 1.5% Atha-depth heterozygosity (H) (X is 24). The earthworm heterozygosity is identified as 1.5%.

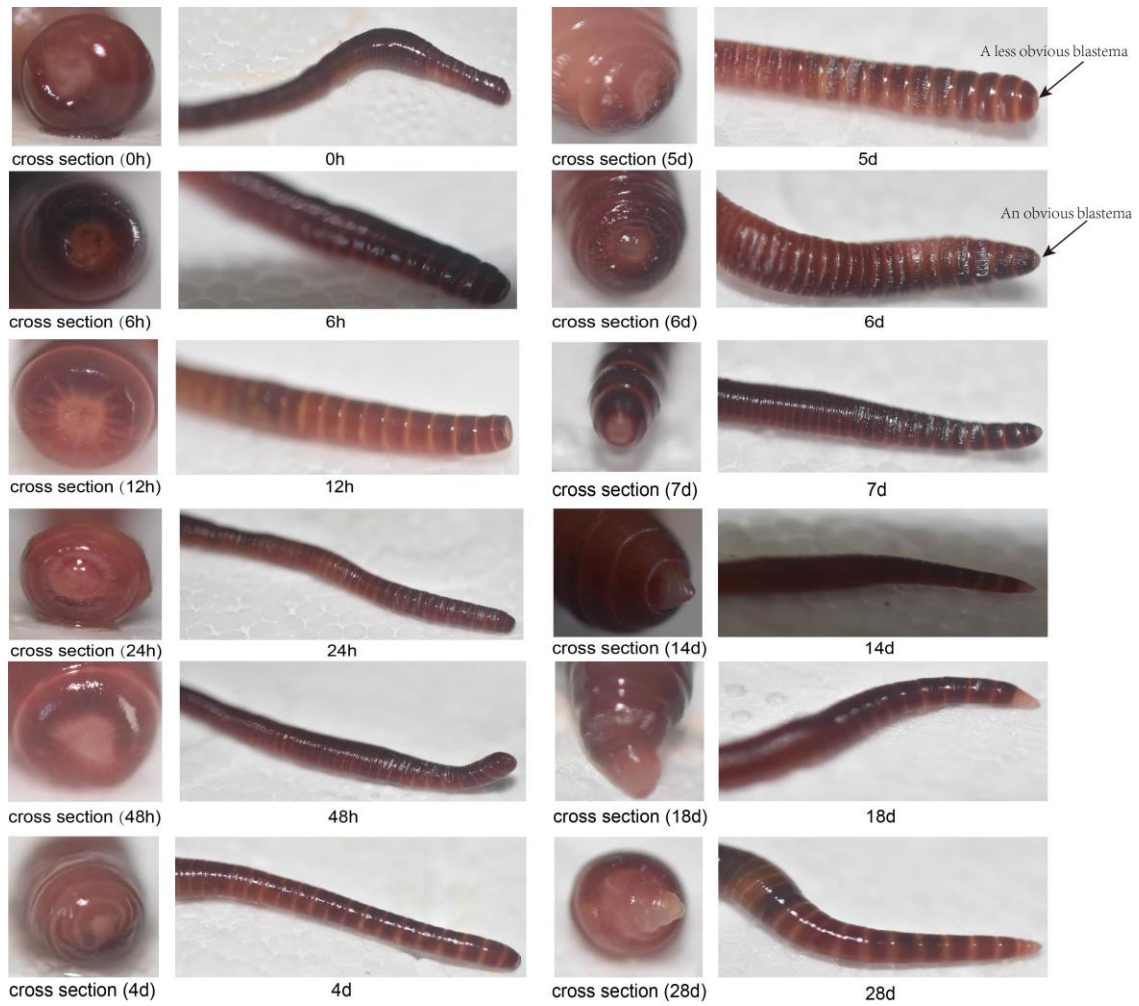

**Supplementary Figure 4 | Snapshots of cross sections at 12 regenerative time points after post-amputation. At 5 days post-amputation a small blastema was formed, and at 6 days post-amputation an obvious blastema was observed.**

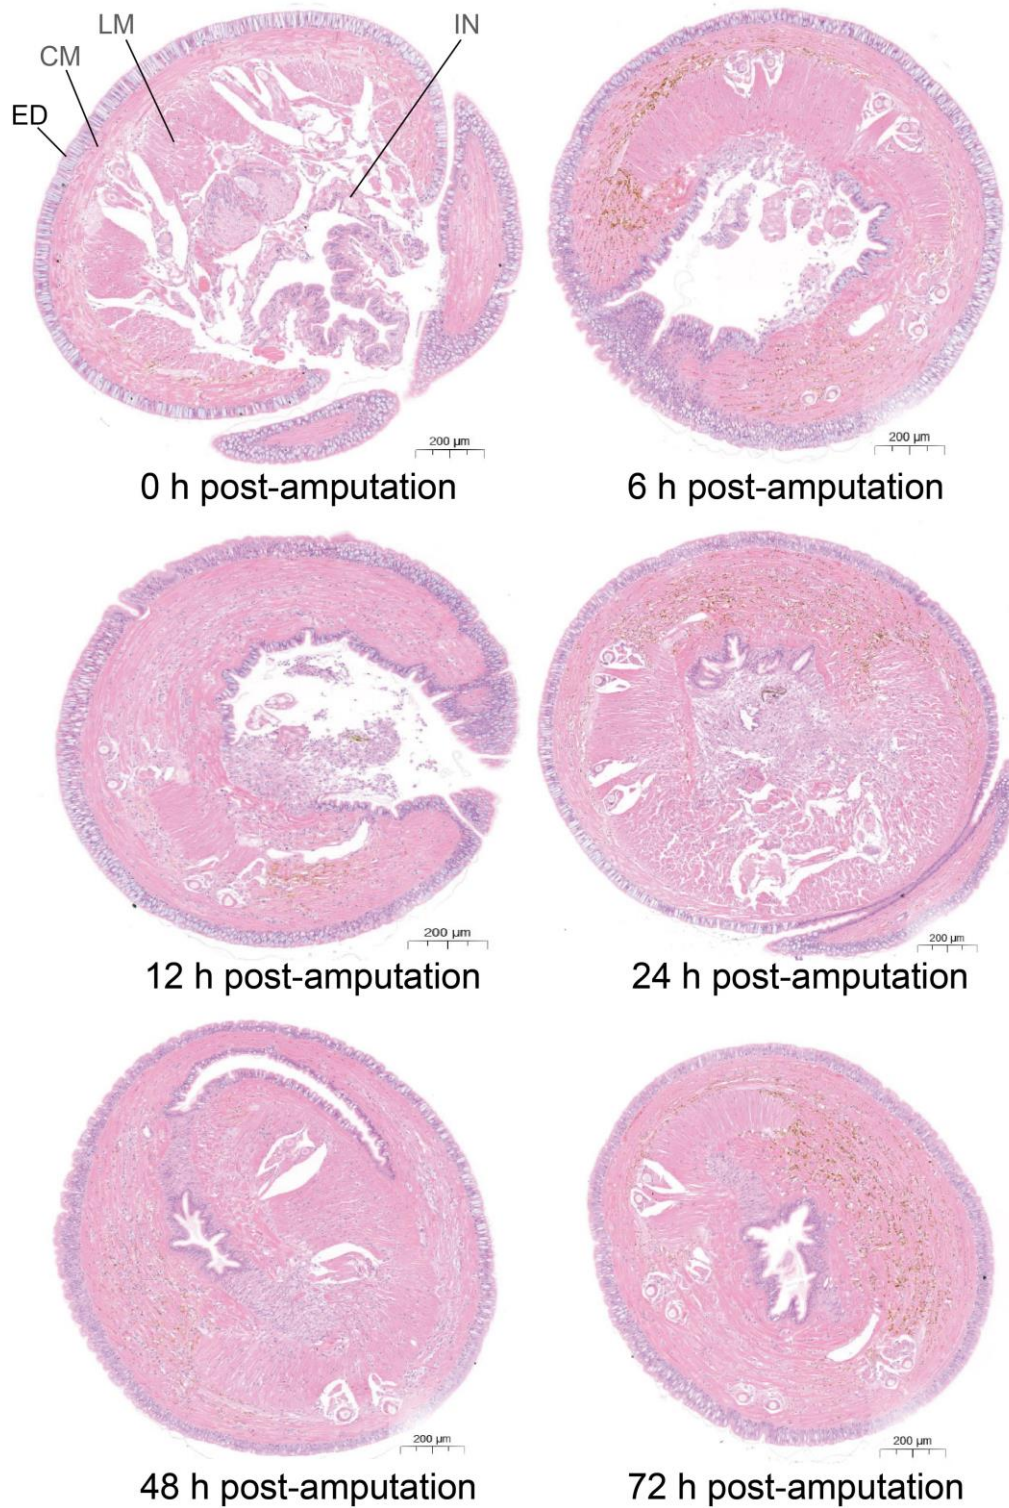

**Supplementary Figure 5 | HE staining of cross sections at six time points post-amputation.** The six time points included 0, 6, 12, 24, 48 and 72 hours post-amputation. The scale size was 200 µm. The different structure layers were labeled. ED: epidermis; CM: circular muscle; LM: longitudinal muscle; IN: intestine. Similar results could be repeated by three independently biological experiments.



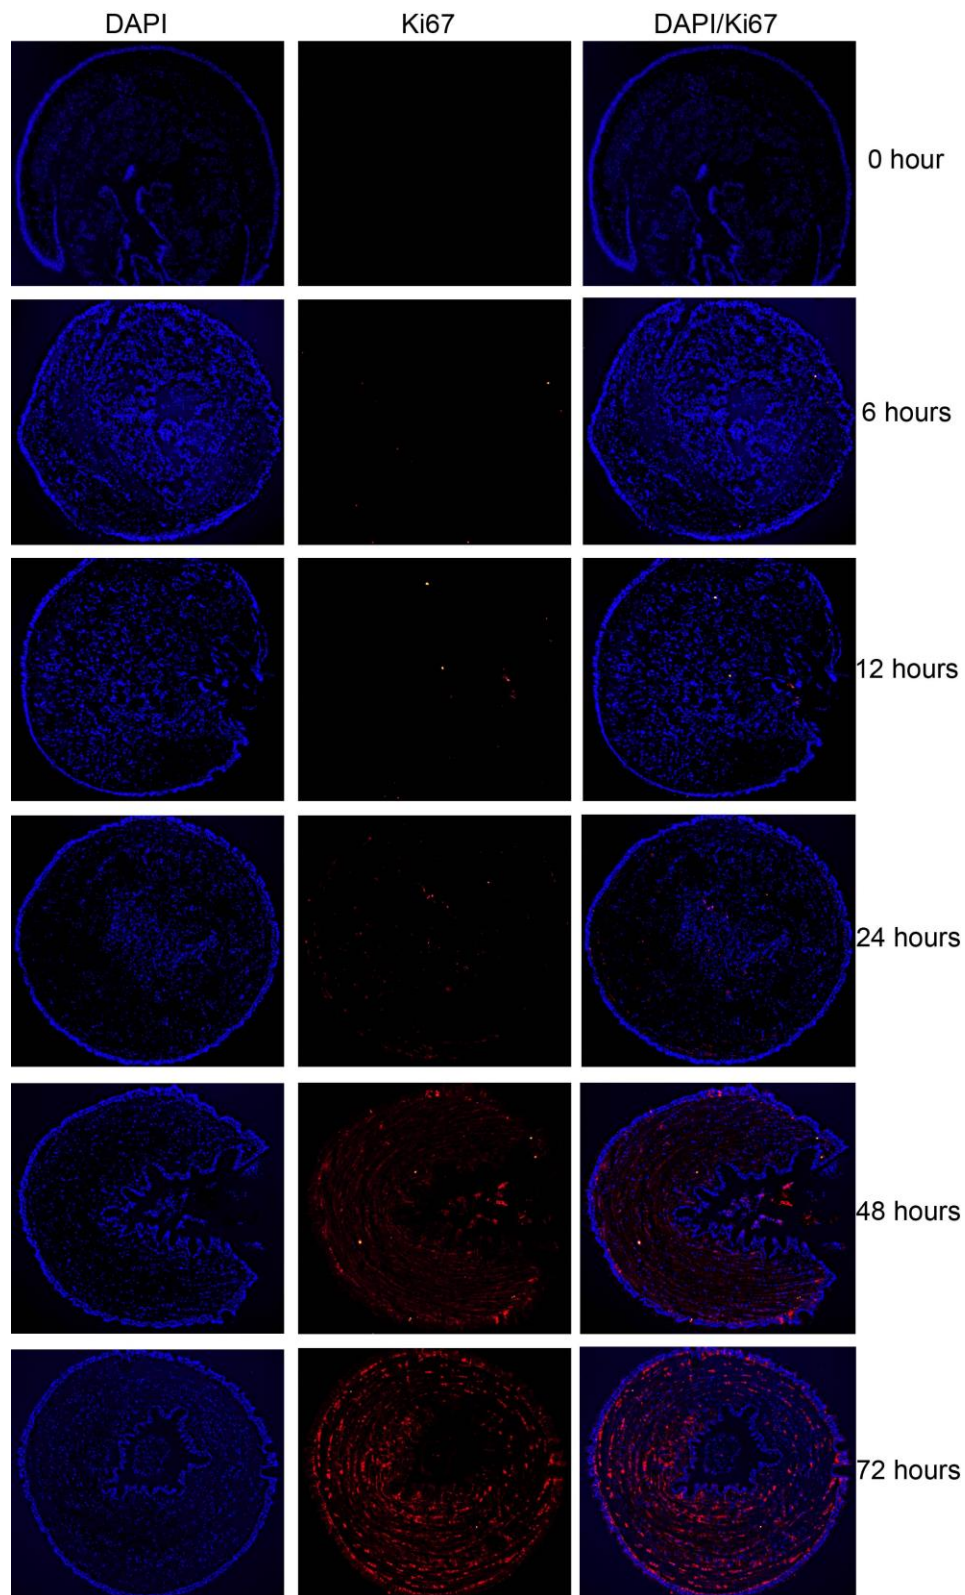

**Supplementary Figure 6 | Cell proliferation experiments using a marker Ki-67 by Immunofluorescent double staining at 0, 6 12, 24, 48 and 72 hours post-amputation.** And the red fluorescence represented signals and the blue fluorescence represented cell nucleus. Similar results could be obtained under two independently biological experiments.

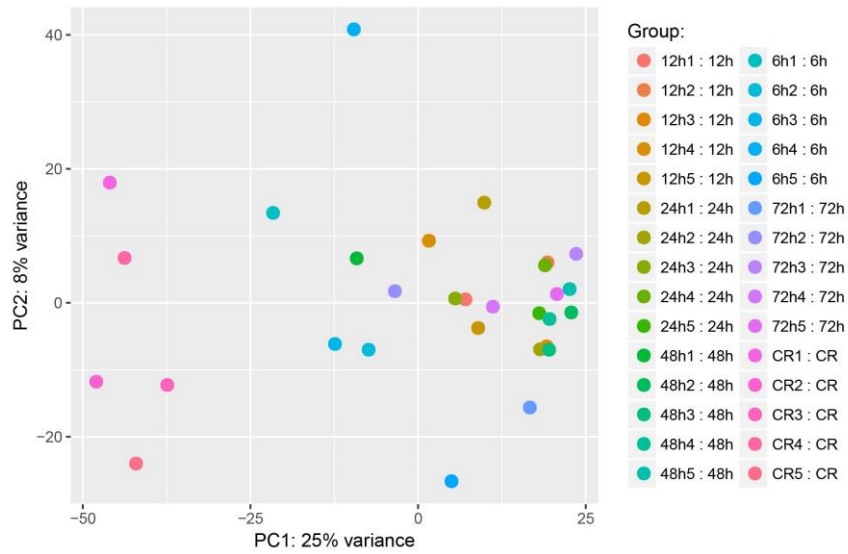

**Supplementary Figure 7 | Expression profile PCA plot of 30 transcriptomes with 6 regeneration time-points.** Controls (before regeneration) and experimental samples (regeneration) can be clearly split by PC1 (25% variance).



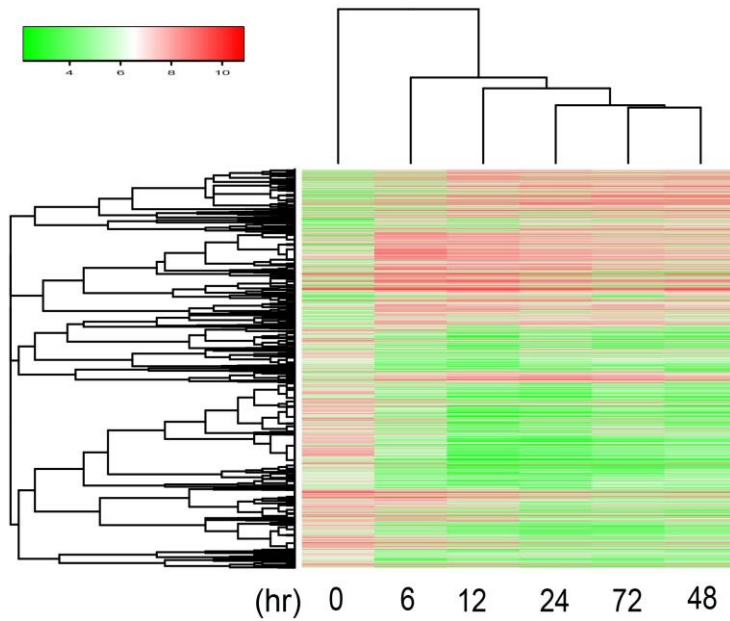

**Supplementary Figure 8 | Heatmap of 6048 DEGs with their changed expression profiles at least in one regeneration time point.** This expression profile represented a whole expression mode of DEGs during the regenerative early stages of earthworms. The expression profile of DEGs was split by regenerative time-order. 6048 DEGs were originated from comparing control stage to all other time points. The expression profile heatmap by using all of DEGs for each stage including control stage (0 hour) was plotted to show the whole expression pattern. The red color in the legend represented higher expression level and the green color represented lower gene expression level.

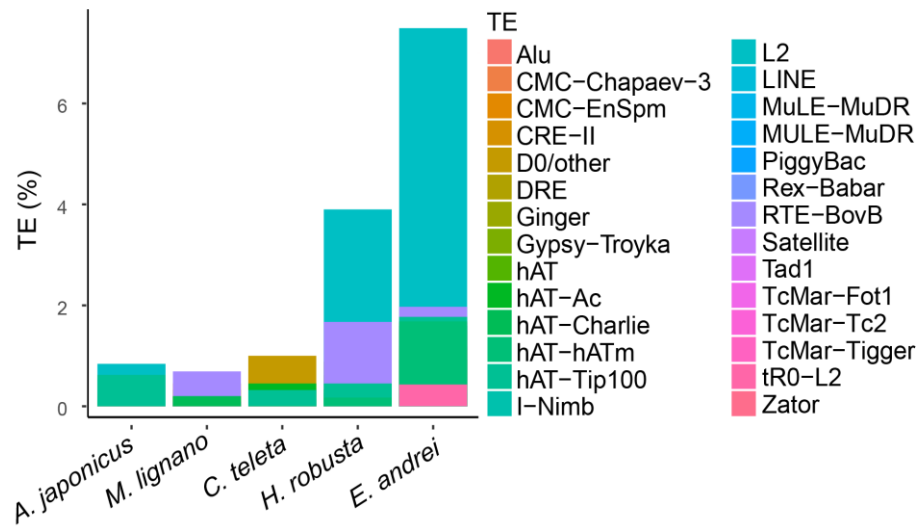

**Supplementary Figure 9 | Content of representative TEs in the genomes of different invertebrates.** 28 representative TEs were compared among five species including *E. Andrei*, *A. japonicas*, *M. lignano*, *C. teleta*, and *H. robusta*. Y-axis represented the % content of TEs in different species genomes, and X-axis represented different species.

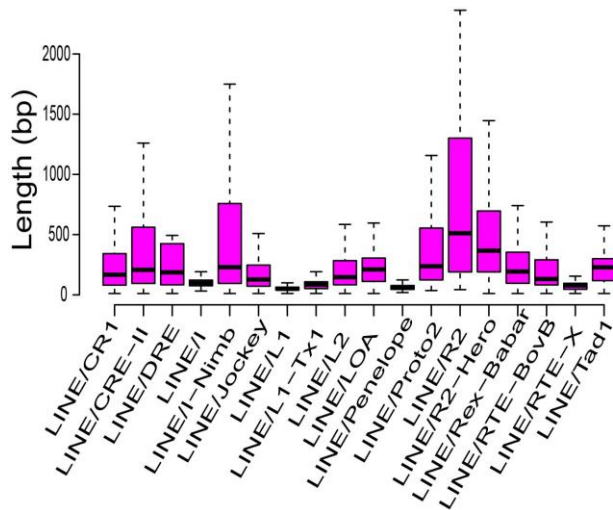

**Supplementary Figure 10 | Boxplot of length distribution for the LINE family**

**in earthworm.** All of LINE family members were showed by X-axis. For each LINE TE, the distribution of the length was plotted. The sample sizes of LINE subclass were showed in the following: CR1 (n=37,125), CRE- II (n=36,513), DRE (n=3,201), I (n=1,531), I-Nimb (n=5,585), Jockey (n=1,698), L1 (n=1,177), L1-Tx1 (n=4,174), L2 (n=457,629), LOA (n=2,262), Penelope (n=179), Proto2 (n=405), R2 (n=240), R2-Hero (n=2206), Rex-Babar (n=13,200), RTE-BovB (n=115,985), RTE-X (n=2,007) and Tad1 (n=6,691). In boxplot, central black thick lines represented medians; boxes represented interquartile ranges including 25th percentile (Q1) and 75th percentile (Q3); thin black lines from up to down illustrated maximum and minimum values, respectively; and whiskers showed 95% confidence intervals.

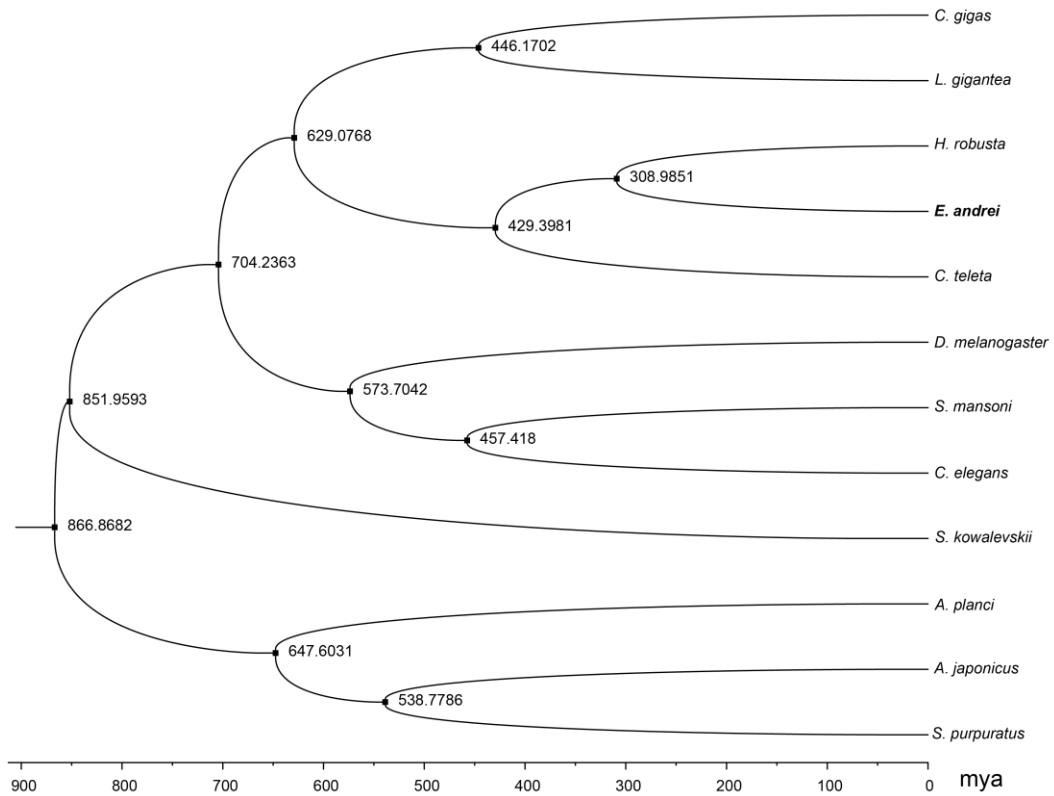

**Supplementary Figure 11 | A time-scale species tree of invertebrates.** The phylogeny was based concatenated one-to-orthologous genes using RAxML with PROTGAMMAAUTO model and 100 bootstraps. MCMCtree in PAML packages was utilized to estimate divergence time. Fossil calibration points were obtained from TimeTree (<http://www.timetree.org/>). All of nodal ages were marked.

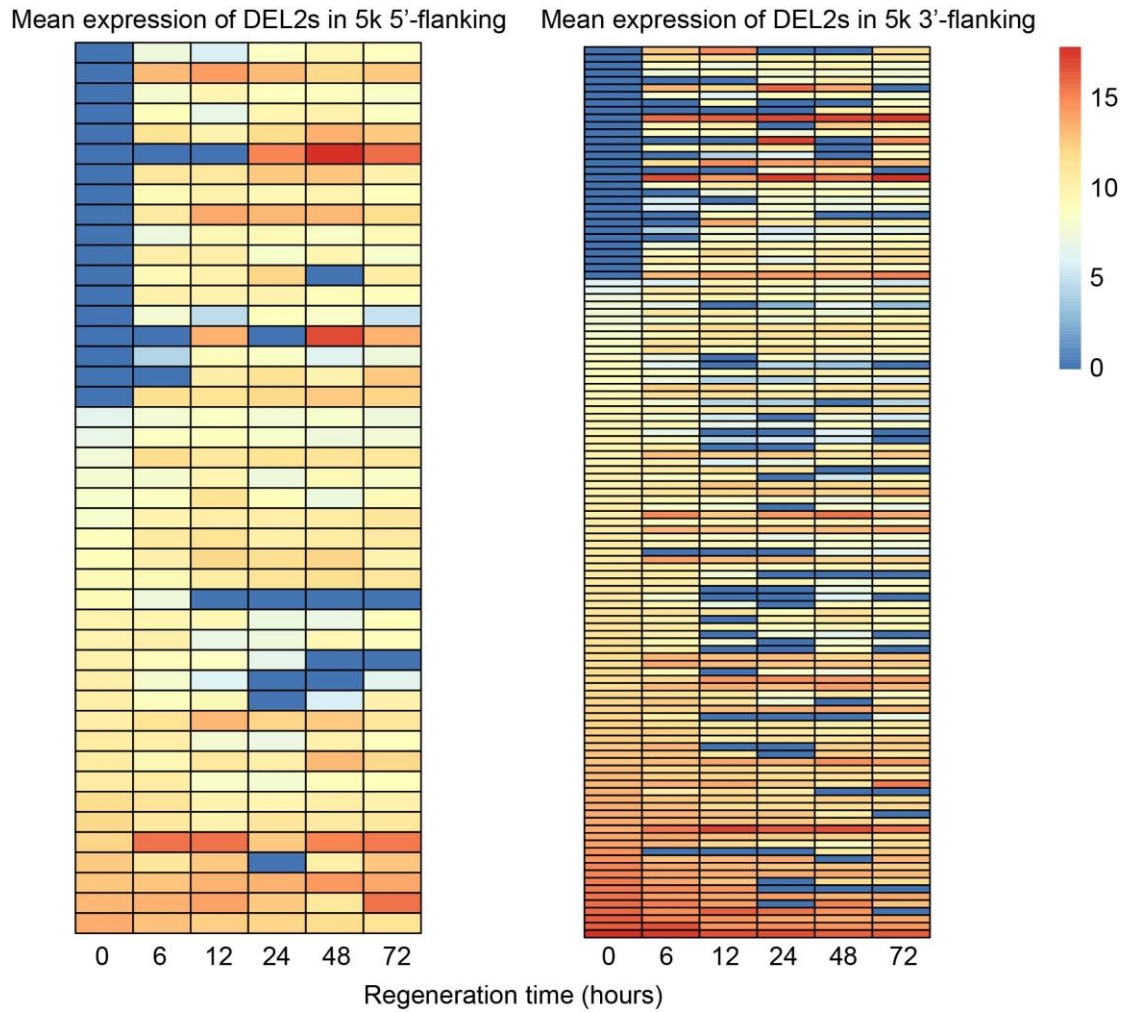

**Supplementary Figure 12 | Expression profiles of differentially expressed LINE2 elements in 5k 5-flanking and 5k 3-flanking of coding genes during regeneration process.** DEL2 represented differentially expressed LINE2 elements. Dark orange represented higher expression levels, and dark blue represented lower expression levels.

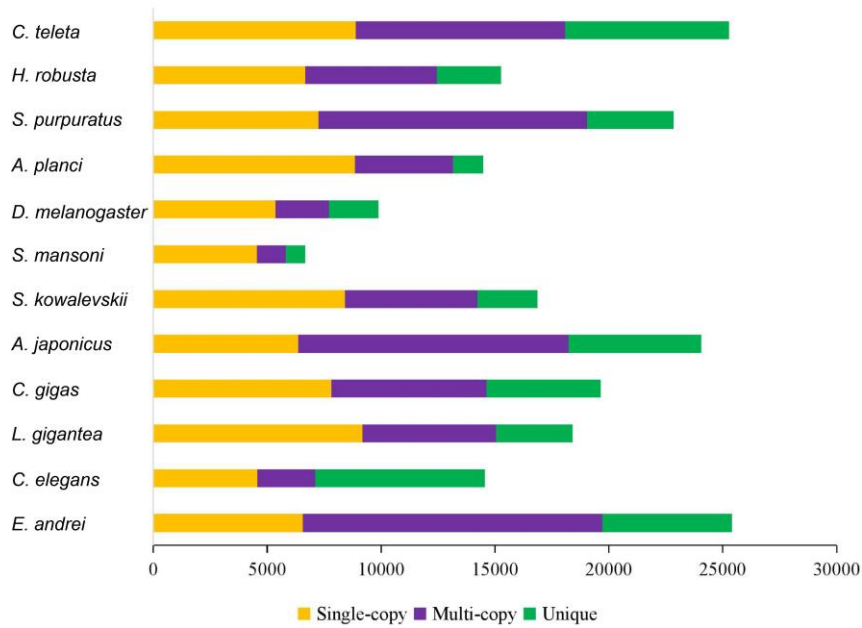

**Supplementary Figure 13 | Comparison of the gene repertoires of 12 invertebrate genomes.** Single-copy orthologues, multi-copy orthologues and unique genes across 12 species are shown by different colors (orange, blue and green).



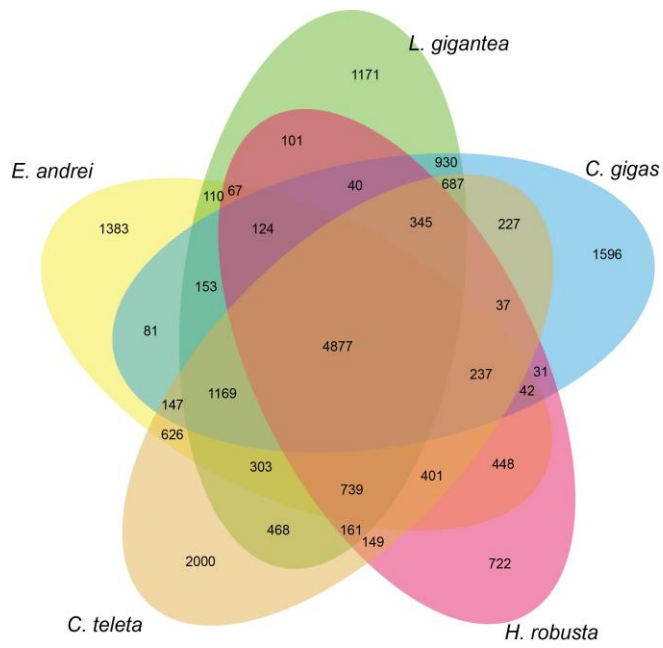

**Supplementary Figure 14 | Co-shared gene families in the genomes of five closely related species.** Five representative species include *E. andrei*, *H. robusta*, *C. teleta*, *C. gigas*, and *L. gigantea*.

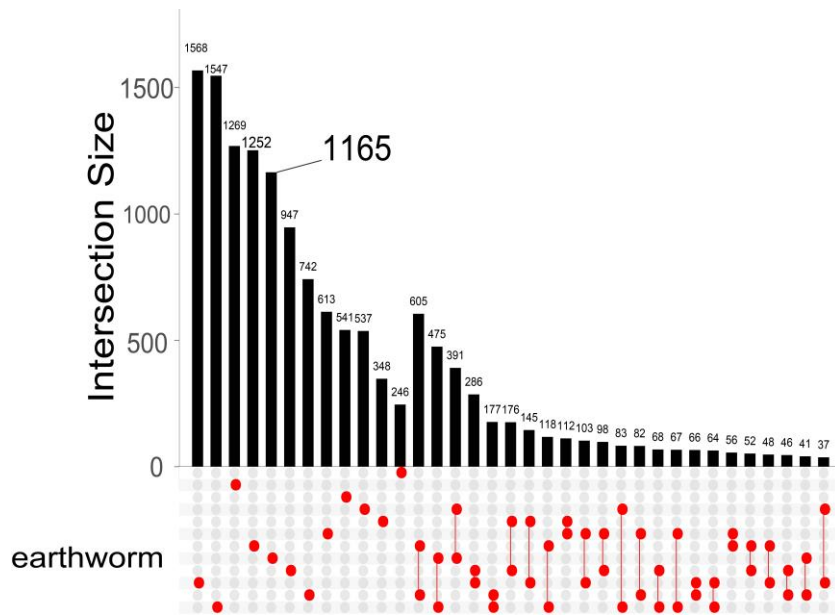

**Supplementary Figure 15 | Intersection size analysis of gene family catalogues across 12 invertebrates.** Parts of the intersections are shown, and the unique gene families of the earthworm are highlighted.

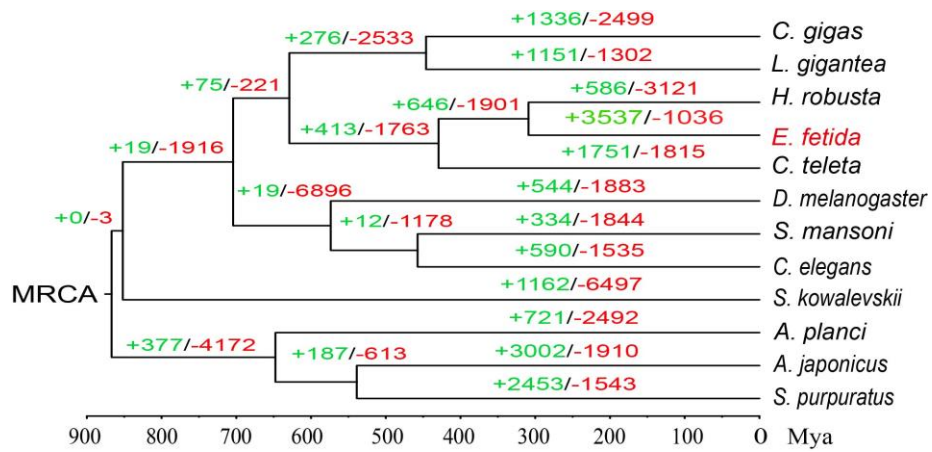

**Supplementary Figure 16 | Evolution of gene families in the earthworm *E. fetida* genome. a,** Expansion/contraction of gene families for 12 invertebrates. Expanded gene families are shown in green and contracted gene families in red at the whole genome levels. The *E. fetida* branch was highlighted by red.

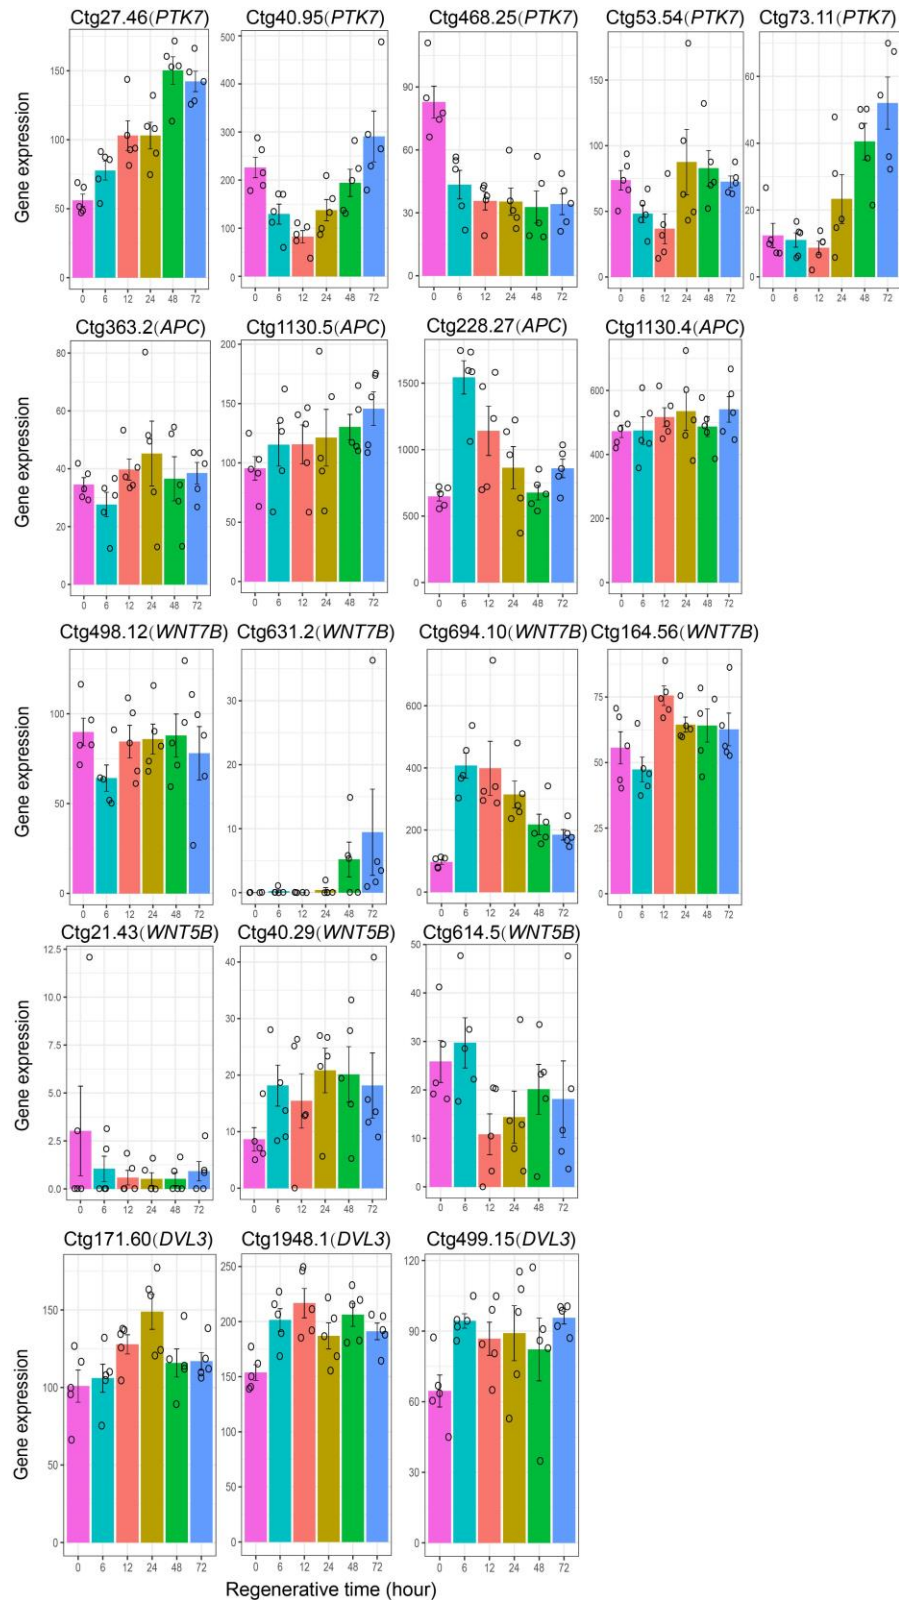

**Supplementary Figure 17 | Expression levels of representative gene family members in WNT signal pathway.** X-axis represents regenerative time points (hour). Each stage included 5 biological replicates (n=5). The error bars were calculated by using standard error of the mean (s.e.m).

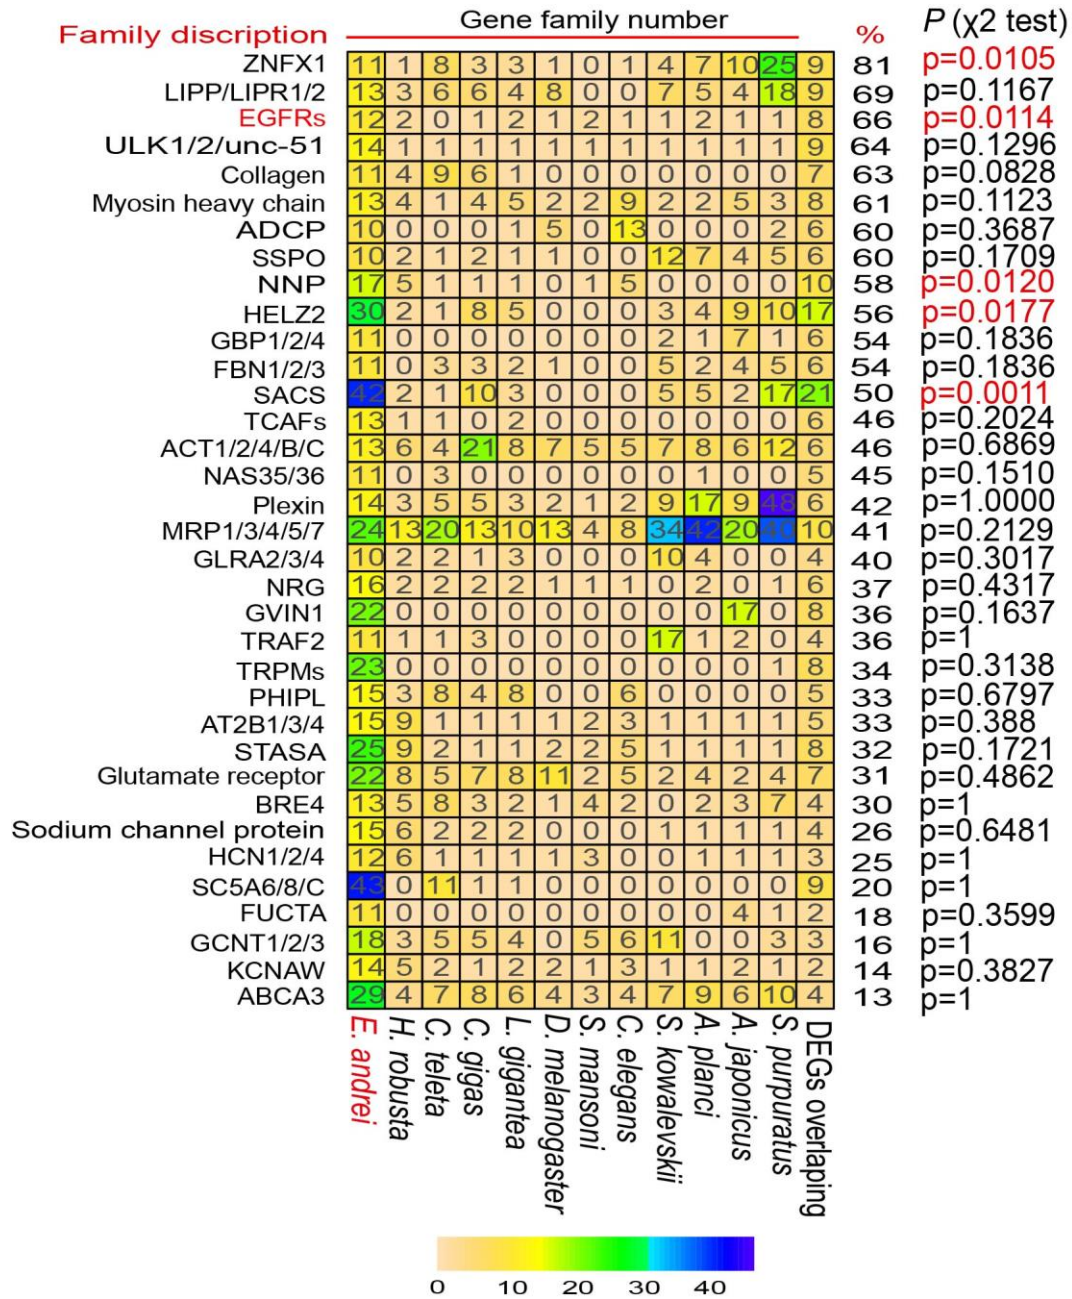

**Supplementary Figure 18 | A heatmap graph of 35 gene families originated from 186 significantly expanded gene families in the earthworm branch with over 10% of their family members displaying significant expression changes during regeneration.** The darker color indicates more family members. The last column number of the heatmap showed the number of co-shared genes between members of an assigned gene family and all of DEGs during early stages of regeneration. For each candidate gene family, a random test was done between observed value of DEGs in regeneration and randomly produced value by using  $\chi^2$  test with Yates' continuity correction.



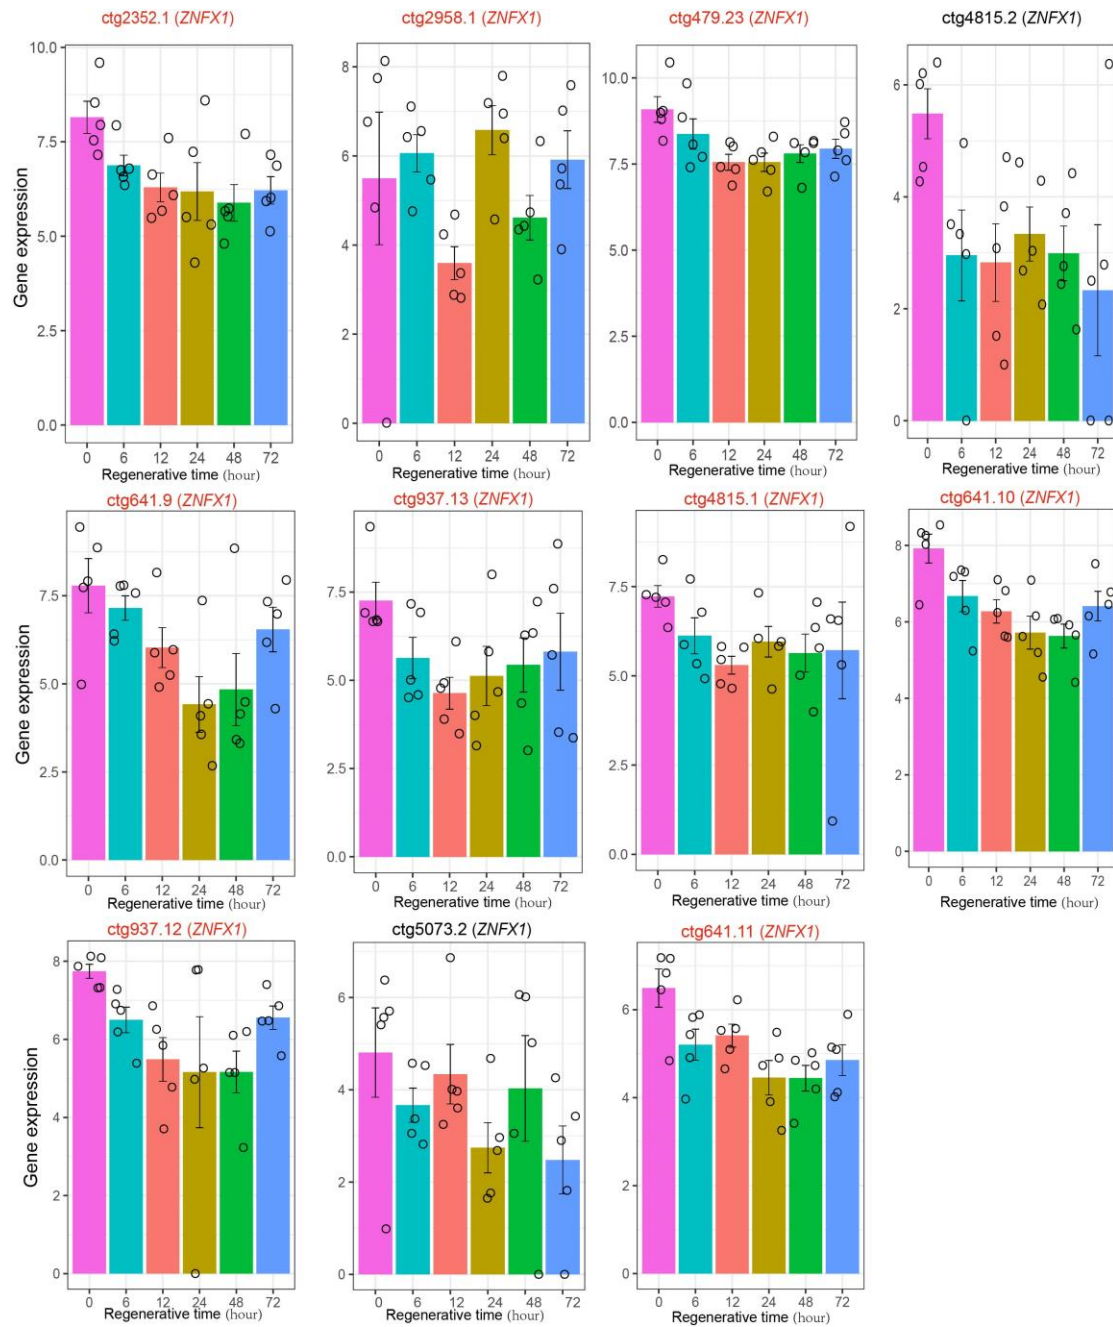

**Supplementary Figure 19 | Differentially expressed analyses of *ZNF1* copies during regenerative processes in the earthworm using different time points post-amputation.** The significant levels were decided by cuffdiff algorithm in Cufflinks and FDR Benjamini-Hochberg multiple correction were performed (Adjusted P value<0.05). The DEGs were highlighted by red. For each regenerative stage, 5 biological replicates for each stage per gene were utilized (n=5). The error bars were calculated by using s.e.m. The adjusted p value for each gene were provided as follows: ctg2352.1: P=7.39985e-04 (0 vs. 6), P=5.60735e-04 (0 vs. 12), P=4.24259e-03 (0 vs. 24), P= 7.0794e-04 (0 vs. 48), P= 6.25935e-04 (0 vs. 72); ctg2958.1: P=0.224247 (0 vs. 6), P=5.60735e-04 (0 vs. 12), P=0.954624 (0 vs. 24), P=2.37766e-06 (0 vs. 48), P= 0.330401 (0 vs. 72); ctg479.23: P=0.137848 (0 vs. 6), P=5.60735e-04 (0 vs. 12), P= 5.89051e-04 (0 vs. 24), P=7.0794e-04 (0



vs. 48),  $P=6.25935e-04$  (0 vs. 72); ctg4815.2:  $P=1$  (0 vs. 6),  $P=1$  (0 vs. 12),  $P=1$  (0 vs. 24),  $P=1$  (0 vs. 48),  $P=1$  (0 vs. 72); ctg641.9:  $P=9.51733e-03$  (0 vs. 6),  $P=5.60735e-04$  (0 vs. 12),  $P=5.89051e-04$  (0 vs. 24),  $P=0.0105512$  (0 vs. 48),  $P=0.00116472$  (0 vs. 72); ctg937.13:  $P=7.39985e-04$  (0 vs. 6),  $P=5.60735e-04$  (0 vs. 12),  $P=5.85558e-03$  (0 vs. 24),  $P=1.30999e-03$  (0 vs. 48),  $P=0.379193$  (0 vs. 72); ctg4815.1:  $P=0.0806205$  (0 vs. 6),  $P=5.60735e-04$  (0 vs. 12),  $P=0.0132856$  (0 vs. 24),  $P=5.45699e-03$  (0 vs. 48),  $P=0.981583$  (0 vs. 72); ctg641.10:  $P=1.91737e-03$  (0 vs. 6),  $P=5.60735e-04$  (0 vs. 12),  $P=5.89051e-04$  (0 vs. 24),  $P=7.0794e-04$  (0 vs. 48),  $P=6.25935e-04$  (0 vs. 72); ctg937.12:  $P=4.80706e-03$  (0 vs. 6),  $P=5.60735e-04$  (0 vs. 12),  $P=0.0201133$  (0 vs. 24),  $P=7.0794e-04$  (0 vs. 48),  $P=7.25809e-03$  (0 vs. 72); ctg5073.2:  $P=1$  (0 vs. 6),  $P=1$  (0 vs. 12),  $P=1$  (0 vs. 24),  $P=1$  (0 vs. 48),  $P=1$  (0 vs. 72); ctg641.11:  $P=0.0188427$  (0 vs. 6),  $P=0.0207513$  (0 vs. 12),  $P=1.97253e-03$  (0 vs. 24),  $P=7.0794e-04$  (0 vs. 48),  $P=2.0991e-03$  (0 vs. 72).

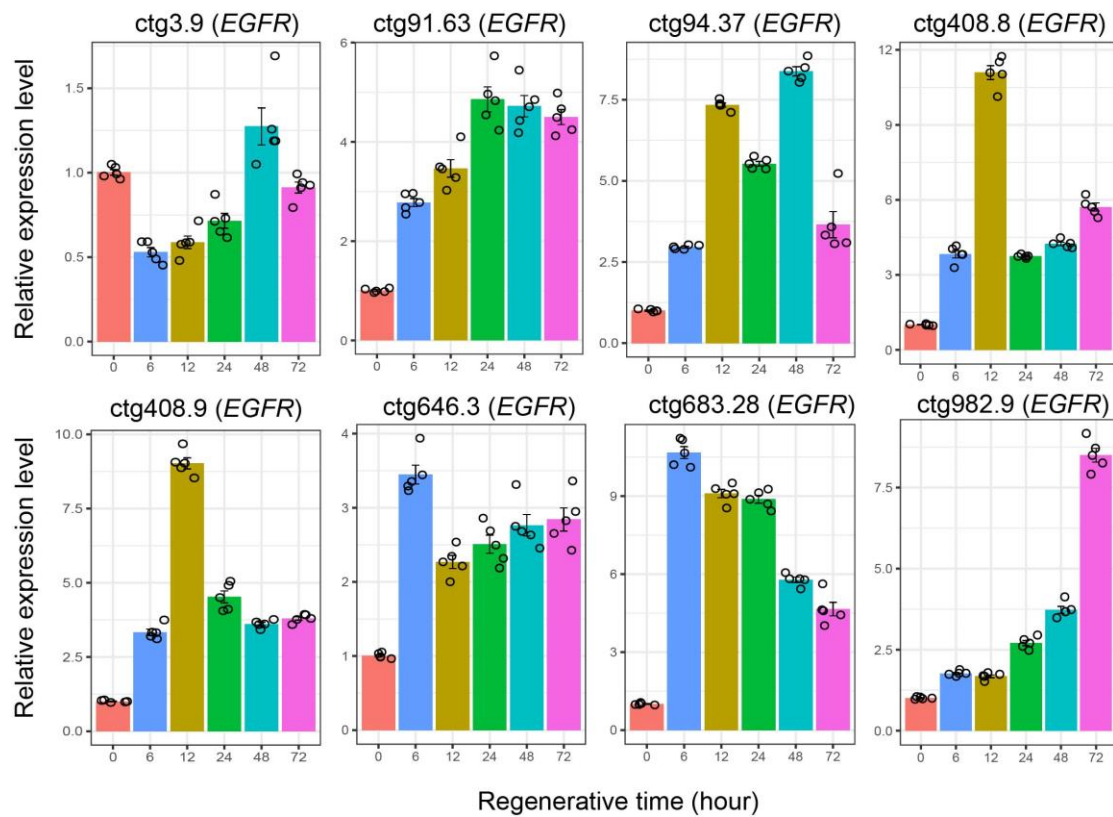

**Supplementary Figure 20 | qPCR analyses of *EGFR* copies during regenerative processes in the earthworm using different time points post-amputation.** Five biological replicates for each time point (n=5) were used and  $\beta$ -actin was served as a reference gene to normalize the relative mRNA expression levels. The error bars were calculated by using the s.e.m. The significance levels between control (regenerative 0 hour) and other stages were calculated by unpaired two tailed t-test. The p values were as follows: ctg3.9: p=0.004731075 (0 vs. 6), p=0.057366 (0 vs. 12), p=0.040812 (0 vs 24), p=0.394488 (0 vs. 48) and p=0.393905 (0 vs. 72); ctg91.63: p=0.002247 (0 vs. 6), p=0.003153 (0 vs. 12), p=0.001503 (0 vs. 24), p=0.001081 (0 vs. 48) and p=0.001573 (0 vs. 72); ctg94.37: p=0.00011 (0 vs. 6); p=1.12e-05 (0 vs. 12), p=0.00145 (0 vs. 24), p=2.13e-05 (0 vs. 48) and p=0.06674 (0 vs 72); ctg408.8: p=0.001907 (0 vs. 6), p=0.000103 (0 vs. 12), p=7.65e-05 (0 vs. 24), p=5.67e-05 (0 vs. 48) and p=0.00047 (0 vs. 72); ctg408.9: p=0.001355 (0 vs. 6), p=2.12e-05 (0 vs.12), p=0.001512 (0 vs. 24), p=0.000184 (0 vs. 48), p=0.000128 (0 vs. 72); ctg646.3: p=0.001388 (0 vs. 6), p=0.003862 (0 vs. 12), p=0.009538 (0 vs. 24), p=0.005377 (0 vs. 48) and p=0.004623 (0 vs. 72); ctg683.28: p=3.16e-05 (0 vs. 6), p=4e-05 (0 vs. 12), p=1.58e-05 (0 vs. 24), p=8.9e-05 (0 vs. 48) and p=0.00212 (0 vs. 72); ctg982.9: p=0.001504 (0 vs. 6), p=0.004977 (0 vs. 12), p=0.001851 (0 vs. 24), p=0.001293 (0 vs. 48) and p=0.000111(0 vs. 72).

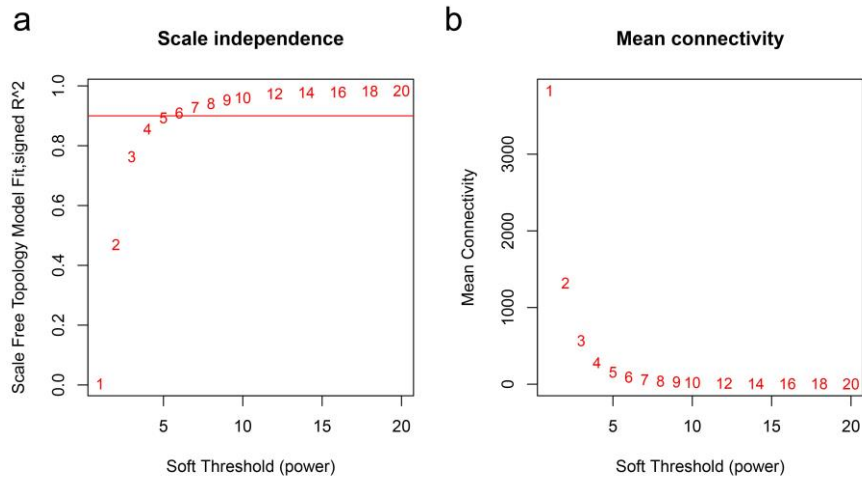

**Supplementary Figure 21 | Analysis of the network topology for various soft-thresholding powers.** The powers vs. scale independence and mean connectivity were showed. **a**, Panel shows the scale-free fit index (y-axis) as a function of the soft-thresholding power (x-axis). The lowest power 6 for the scale-free topology fit reached 0.90. When power equals to 10, then the scale-free topology fit was saturated. **b**, Panel displays the mean connectivity (degree, y-axis) as a function of the soft-thresholding power (x-axis).

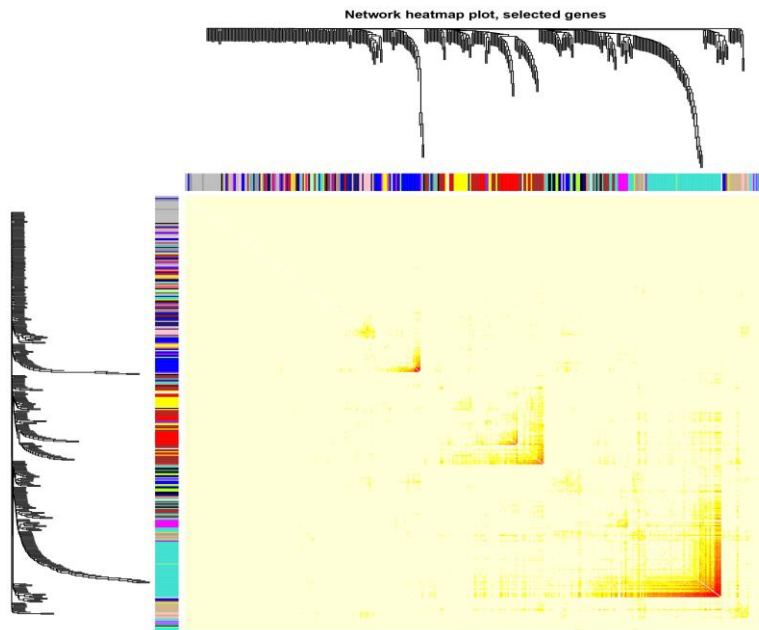

**Supplementary Figure 22 | Visualization of the gene network using a heatmap plot.** Heatmap depicts the topological overlap matrix (TOM) among all genes in the analysis. Light color represents low overlap and progressively darker red color represents higher overlap. Blocks of darker colors along the diagonal are the constructed modules. Gene dendrogram and module assignment are shown along the left side and the top.

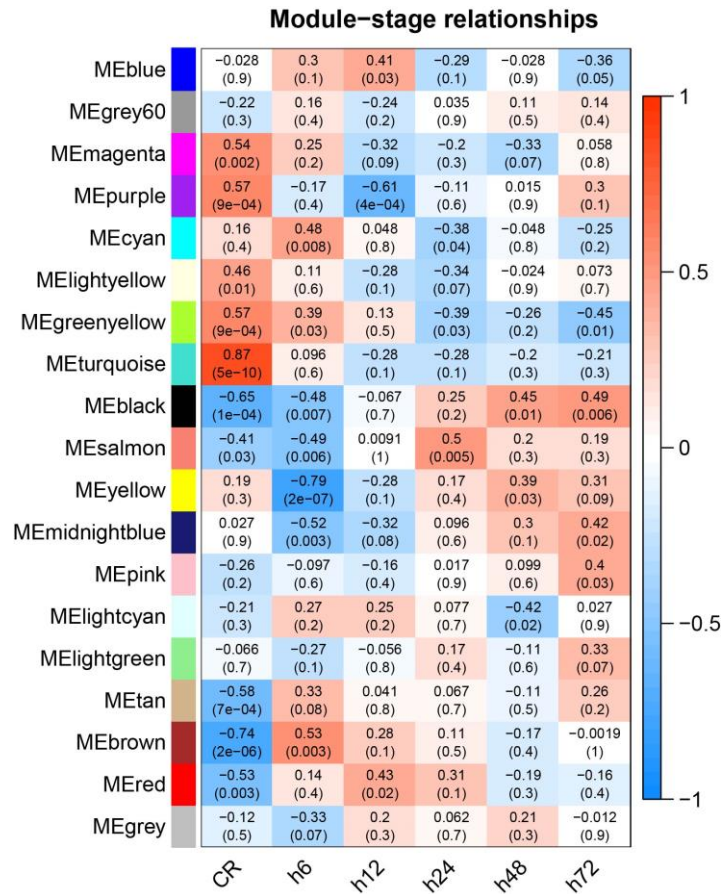

**Supplementary Figure 23 | Module-regeneration-stage associations.** Each row corresponds to a module eigengene and columns to a trait. Each cell contains the corresponding correlation and *P*-value. Table is color-coded by correlation according to the color legend.

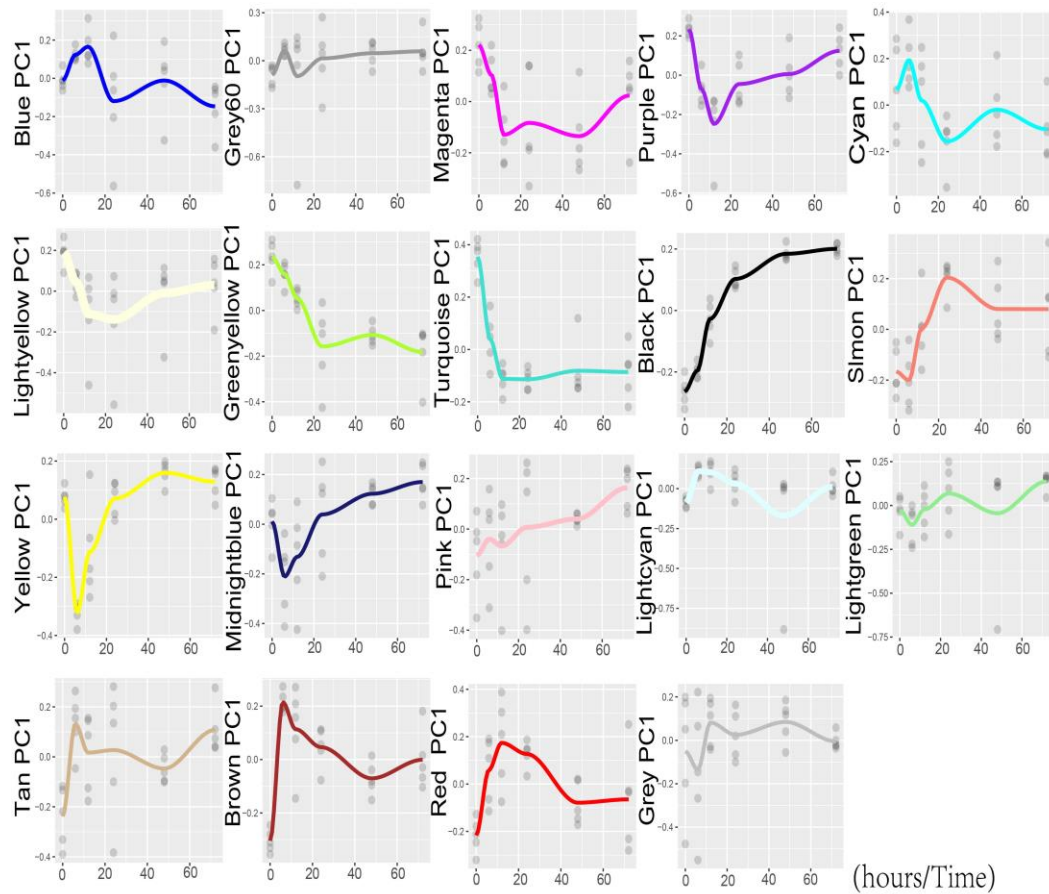

**Supplementary Figure 24 | Characterization of the module trajectory throughout regeneration processes.** The fit line represents locally weighted scatterplot smoothing. X-axis represents regenerative time points (hours). Y-axis represents module PC1 (Module-eigene).



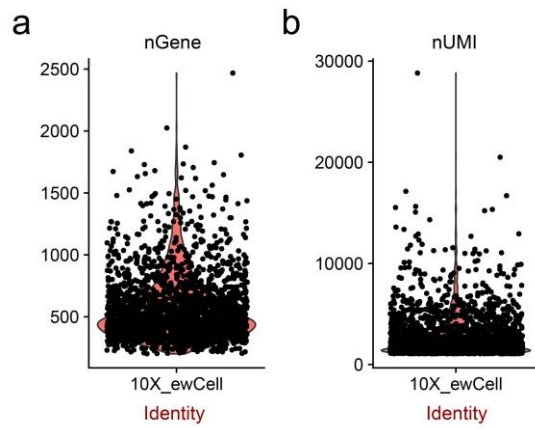

**Supplementary Figure 25 | Number of genes and UMIs.** The two plots for genes and nUMI in the earthworm single cell transcriptome. **a**, Number of genes. **b**, Number of UMIs.

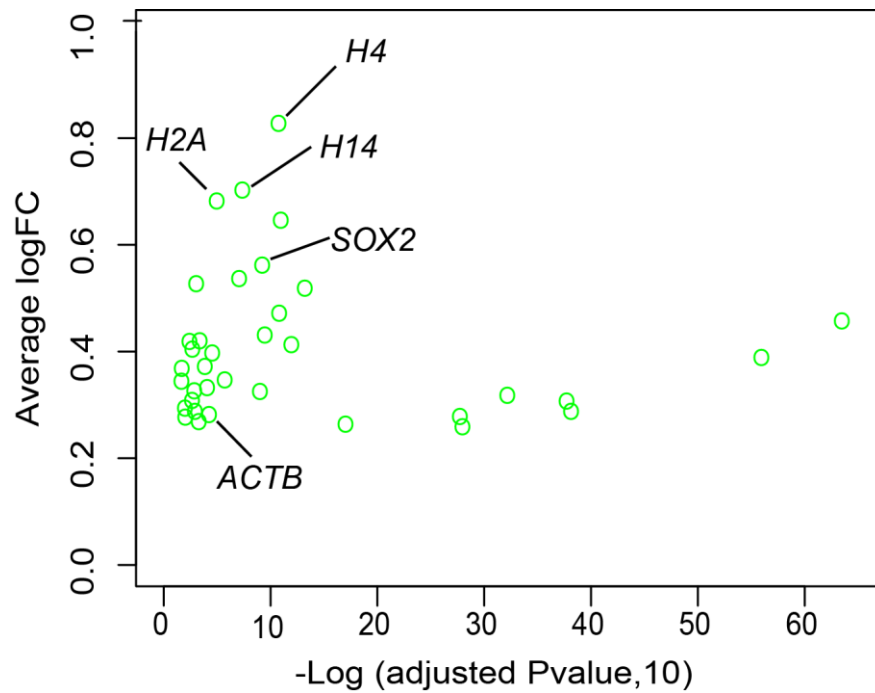

**Supplementary Figure 26 | Expressions of gene markers in pluripotent stem cell cluster0.** Scatter plot of identified markers for cluster0, including well-known pluripotent marker genes. X-axis represented normalized  $P$  value. Y-axis represented fold changes of gene expressions.

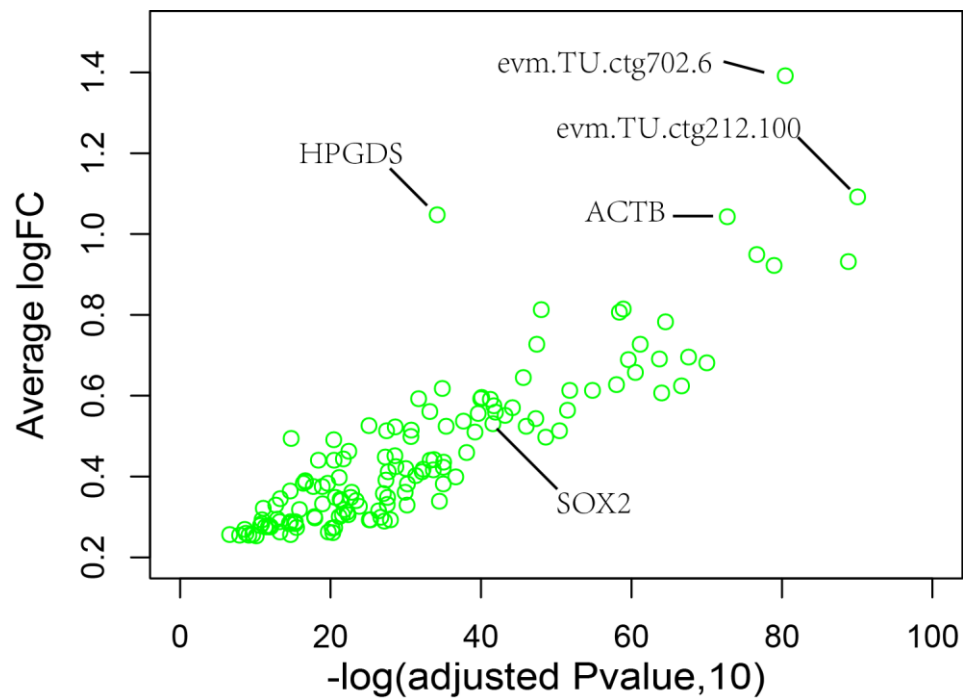

**Supplementary Figure 27 | Expressions of gene markers in pluripotent stem cell cluster1.** Scatter plot of identified markers for cluster1, including well-known pluripotent marker genes. X-axis represented normalized  $P$  value. Y-axis represented fold changes of gene expressions.

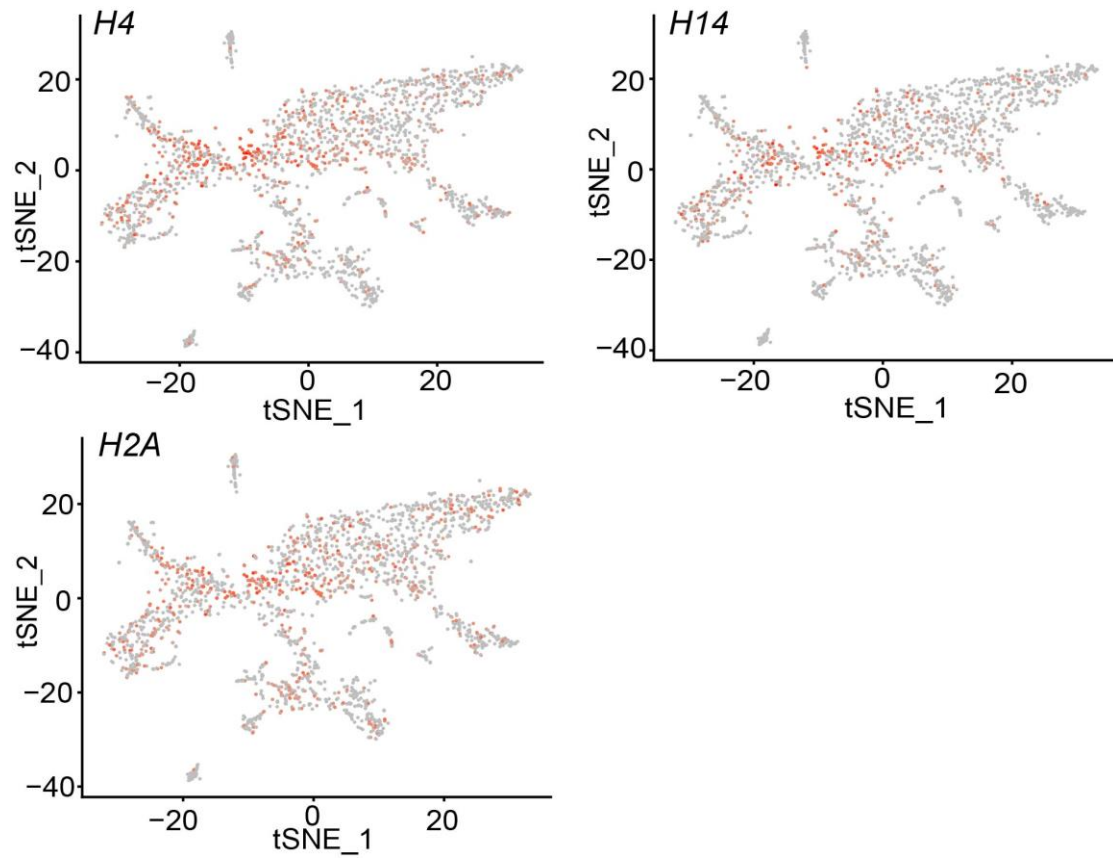

**Supplementary Figure 28 | Expression of histone genes using the t-SNE plot.** Cells expressing *H4*, *H14* and *H2A* were colored by red in different plots, respectively.

### cluster1 GO enrichment analyses

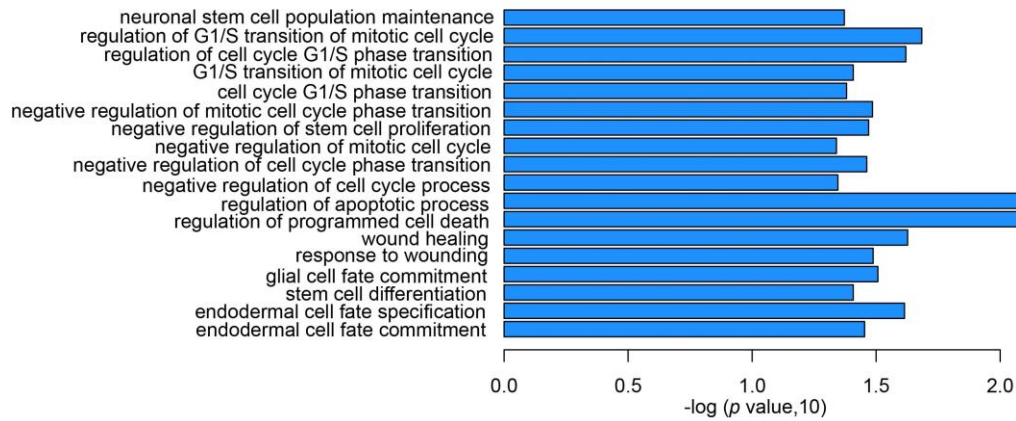

### cluster3 GO enrichment analyses

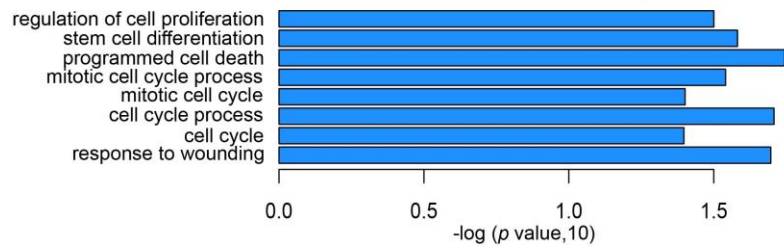

**Supplementary Figure 29 | GO biological process enrichment analyses of highly expressed marker genes in clusters 1 and 3.** GO enrichment analyses were performed by using g:Profiler software (<https://biit.cs.ut.ee/>). All known genes of statistical domain size using Homo sapiens were regarded as background and  $p$  values (Significance threshold) were adjusted by using Benjamini-Hochberg FDR.

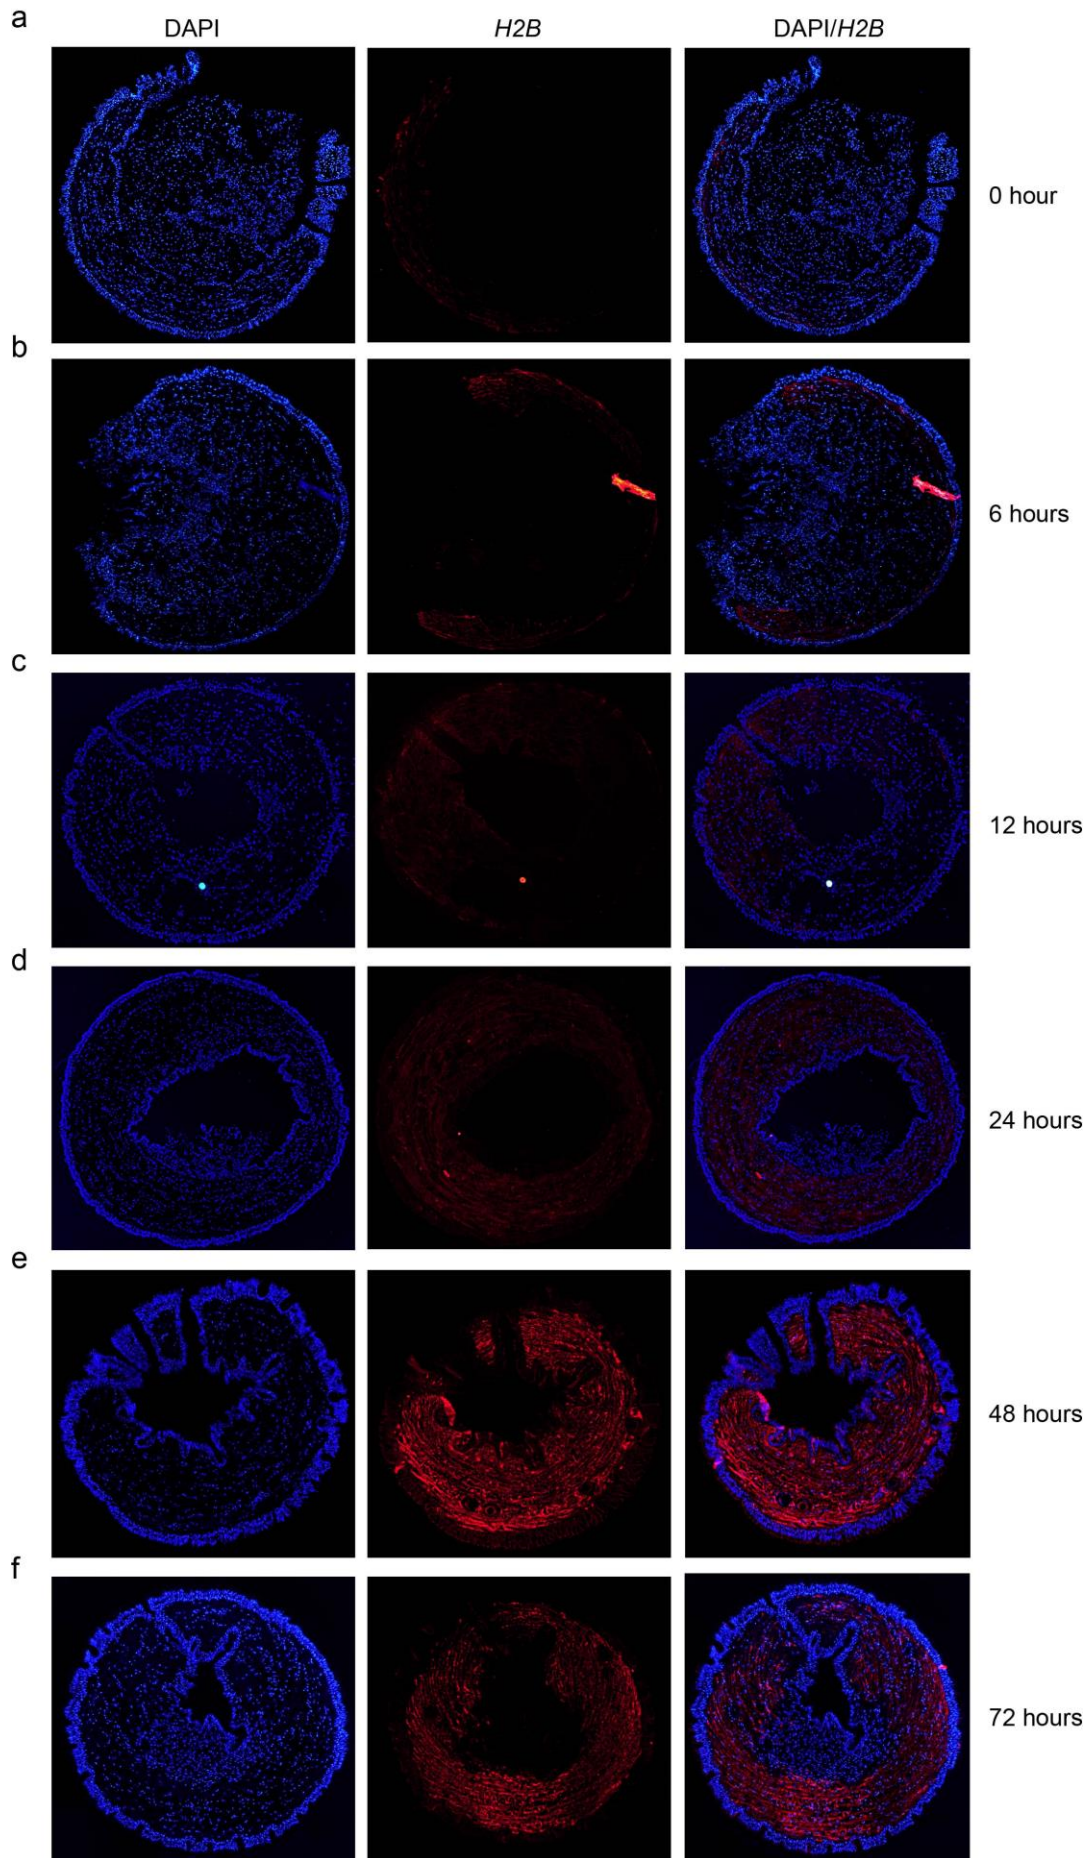



**Supplementary Figure 30 | In situ hybridization of *H2B* in cross sections at 6 time points post-amputation for the earthworm.** The slice size was 10 $\mu$ m. The 6 time points post-amputation included 0, 6, 12, 24, 48 and 72 hours. The red fluorescence represented positive signals and DAPI (blue fluorescence) was used to stain cell nucleus. **a**, 0 hour. **b**, 6 hours. **c**, 12 hours. **d**, 24 hours. **e**, 48 hours. **f**, 72 hours. Similar results in **a**, **b**, **c**, **d**, **e** and **f** could be reproduced under three independently biological experiments.

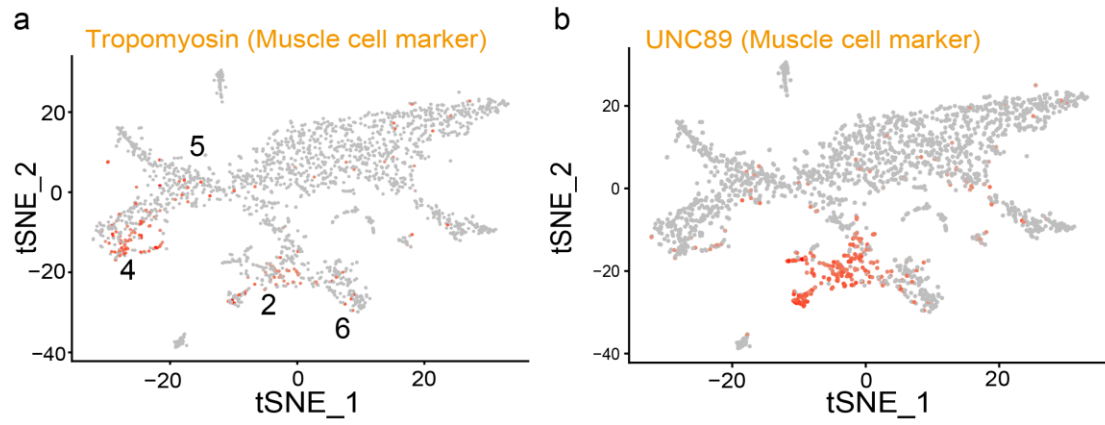

**Supplementary Figure 31 | Characterizations of cluster 2 and 4 with published muscle cell marker gene with tSNE plot. a, *Tropomyosin*. b, *UNC89*.**

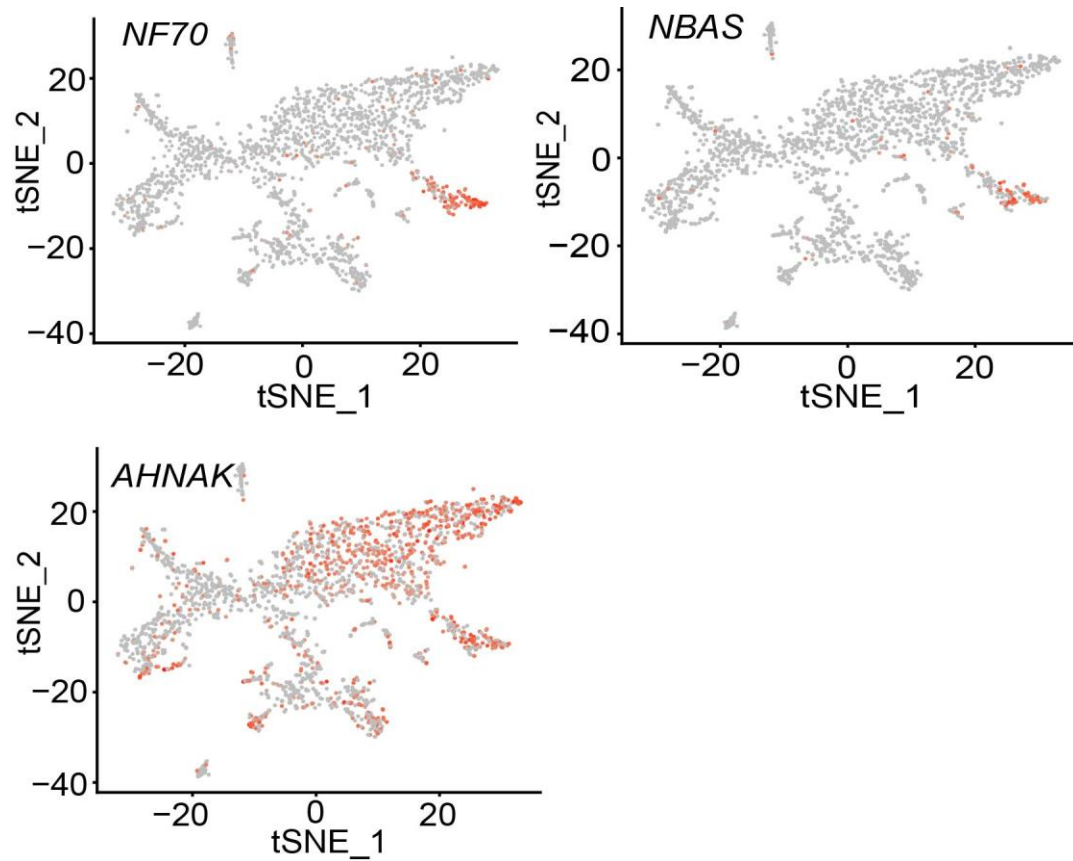

**Supplementary Figure 32 | Characterization of cluster 7 with a neuronal cell maker gene with tSNE plot.** The genes *NBAS*, *AHNAK* and *NF70*<sup>1-3</sup> playing roles in neural cells are neuronal cell markers.

|                     | Wtdbg | FALCON | Canu  |
|---------------------|-------|--------|-------|
| Genome size (Gb)    | 1.3   | 1.6    | 2.1   |
| Longest contig (Mb) | 6.0   | 3.3    | 5.7   |
| Contig N50 (Kb)     | 740.8 | 225.1  | 255.2 |
| Contig N90 (Kb)     | 65.1  | 62.7   | 50.3  |

**Supplementary Table 1 | Comparison of earthworm genome assembly using Wtdbg, FALCON and Canu.**

| <b>Species</b>                       | <b>Genome size</b> | <b>Contig N50</b> | <b>Gene Number</b> | <b>Published Year</b> |
|--------------------------------------|--------------------|-------------------|--------------------|-----------------------|
| <i>Ciona intestinalis</i>            | 160 Mb             | 20 Kb             | 16,000             | 2002                  |
| <i>Strongylocentrotus purpuratus</i> | 814 Mb             | 18.5 Kb           | 23,300             | 2006                  |
| <i>Nematostella vectensis</i>        | 470 Mb             | 19.8 Kb           | 18,000             | 2007                  |
| <i>Hydra magnipapillata</i>          | 1.05 Gb            | 12.8 Kb           | 20,000             | 2010                  |
| <i>Ectocarpus siliculosus</i>        | 214 Mb             | 32 Kb             | 16,256             | 2010                  |
| <i>Acropora digitifera</i>           | 420 Mb             | 10 Kb             | 23,688             | 2011                  |
| <i>Capitella teleta</i>              | 324 Mb             | 21.9 Kb           | 32,389             | 2012                  |
| <i>Crassostrea gigas</i>             | 559 Mb             | 19.4 Kb           | 28,000             | 2012                  |
| <i>Lottia gigantea</i>               | 348 Mb             | 96 Kb             | 23,800             | 2012                  |
| <i>Mnemiopsis leidyi</i>             | 150 Mb             | 11.9 Kb           | 16,548             | 2013                  |
| <i>Hippocampus comes</i>             | 695 Mb             | 34.7 Kb           | 23,458             | 2016                  |
| <i>Paralichthys olivaceus</i>        | 546 Mb             | 30.5 Kb           | 21,787             | 2016                  |
| <i>Patinopecten yessoensis</i>       | 988 Mb             | 38 Kb             | 26,415             | 2017                  |
| <i>Acanthaster planci</i>            | 383 Mb             | 54.9 Kb           | 20,328             | 2017                  |
| <i>Bathymodiolus platifrons</i>      | 1.64 Gb            | 13.2 Kb           | 33,584             | 2017                  |
| <i>Apostichopus japonicus</i>        | 805 Mb             | 190.3Kb           | 30,350             | 2017                  |
| <i>Macrostomum lighano</i>           | 764Mb              | 215.3 Kb          | 49,018             | 2017                  |
| <b><i>Eisenia andrei</i></b>         | <b>1.3 Gb</b>      | <b>741 Kb</b>     | <b>31,817</b>      | <b>Present study</b>  |

**Supplementary Table 2 | Assembly statistics of published invertebrate genomes.**

| <b>Samples</b> | <b>Number of mapped assemblies</b> | <b>Number of assemblies</b> | <b>Ratio</b> |
|----------------|------------------------------------|-----------------------------|--------------|
| 12hr1          | 209,432                            | 220,226                     | 95.1%        |
| 24hr2          | 198,133                            | 212,579                     | 93.2%        |
| 48hr5          | 211,491                            | 223,102                     | 94.8%        |
| 6hr3           | 215,030                            | 227,820                     | 94.4%        |
| 72hr4          | 200,312                            | 209,859                     | 95.5%        |
| CR3            | 225,239                            | 233,332                     | 96.5%        |

**Supplementary Table 3 | Summary of six randomly selected earthworm transcriptomes assembled by Trinity.**

|        | <b>Complete</b> | <b>Fragmented</b> | <b>Missing</b> |
|--------|-----------------|-------------------|----------------|
| Number | 901             | 13                | 64             |
| Ratio  | 92.1%           | 1.3%              | 6.6%           |

**Supplementary Table 4 | BUSCO analysis of the draft assembly.**

| Approach       |                   | Gene number | Total CDS length (Mb) | Average CDS length (bp) | Average exons per gene | Average exon length (bp) | Average intron length (bp) |
|----------------|-------------------|-------------|-----------------------|-------------------------|------------------------|--------------------------|----------------------------|
| <i>De novo</i> | Augustus          | 53,171      | 75.46                 | 1,419                   | 5.56                   | 255                      | 2,261                      |
|                | SNAP              | 53,242      | 64.26                 | 1,206                   | 5.41                   | 223                      | 3,298                      |
| Homology       | <i>C. teleta</i>  | 33,558      | 24.77                 | 738                     | 4.18                   | 176                      | 1,453                      |
|                | <i>H. robusta</i> | 24,970      | 18.77                 | 751                     | 4.03                   | 186                      | 1,460                      |
| Transcriptome  | Cufflinks         | 46,765      | 145.12                | 3,103                   | 5.52                   | 562                      | 2,409                      |
| EVM            |                   | 31,817      | 56.37                 | 1,771                   | 8.03                   | 221                      | 2,333                      |

**Supplementary Table 5 | Statistics of predicted protein-coding genes in the earthworm genome.**



| <b>Category</b> | <b>Number</b> | <b>Ratio</b> |
|-----------------|---------------|--------------|
| GO              | 19,006        | 59.7%        |
| InterPro        | 24,498        | 77.0%        |
| KEGG            | 24,467        | 76.9%        |
| SwissProt       | 21,717        | 68.3%        |
| Trembl          | 26,535        | 83.4%        |
| All             | 27,728        | 87.1%        |

**Supplementary Table 6 | Functional annotation of protein-coding genes in diverse databases.**

| <b>Category</b> | <b>Number</b> | <b>Length(bp)</b> |
|-----------------|---------------|-------------------|
| tRNA            | 1,292         | 102,608           |
| rRNA            | 34            | 21,880            |
| miRNA           | 1,244         | 154,131           |
| snRNA           | 234           | 37,788            |
| All             | 2,804         | 316,407           |

**Supplementary Table 7 | Summary of predicted non-coding RNA genes in the earthworm genome.**

|         | Rebase TEs |          | RepeatModeler TEs |          | Combined TEs |          |
|---------|------------|----------|-------------------|----------|--------------|----------|
|         | Length(bp) | Ratio(%) | Length(bp)        | Ratio(%) | Length(bp)   | Ratio(%) |
| DNA     | 2,175,695  | 0.17     | 187,691,577       | 14.27    | 186,269,725  | 14.16    |
| LINE    | 13,039,549 | 0.99     | 163,564,336       | 12.43    | 163,423,637  | 12.42    |
| LTR     | 332,512    | 0.03     | 30,978,179        | 2.35     | 30,145,435   | 2.29     |
| SINE    | 1,367,910  | 0.10     | 7,637,895         | 0.58     | 7,718,111    | 0.59     |
| Other   | 66,712,812 | 5.07     | 69,920,579        | 5.31     | 74,854,175   | 5.69     |
| Unknown | 332,064    | 0.03     | 284,504,576       | 21.62    | 283,875,506  | 21.58    |
| Total   | 83,960,542 | 6.38     | 744,297,142       | 56.57    | 746,286,589  | 56.72    |

**Supplementary Table 8 | Analysis of transposable elements in the earthworm genome.**

| <b>FDR</b> | <b>Gene Number</b> | <b>GO ID</b> | <b>GO Taxonomy</b> | <b>GO Name</b>                                                |
|------------|--------------------|--------------|--------------------|---------------------------------------------------------------|
| 4.30E-02   | 3                  | GO:0016266   | BP                 | O-glycan processing                                           |
| 2.80E-02   | 3                  | GO:0071427   | BP                 | mRNA-containing ribonucleoprotein complex export from nucleus |
| 2.80E-02   | 3                  | GO:0006406   | BP                 | mRNA export from nucleus                                      |
| 2.58E-02   | 12                 | GO:0070647   | BP                 | protein modification by small protein conjugation or removal  |
| 1.69E-02   | 8                  | GO:0002376   | BP                 | immune process                                                |
| 1.51E-02   | 8                  | GO:0006955   | BP                 | immune response                                               |
| 2.80E-02   | 6                  | GO:0009605   | BP                 | response to external stimulus                                 |
| 1.81E-02   | 7                  | GO:0051704   | BP                 | multi-organism process                                        |
| 1.06E-02   | 104                | GO:0051179   | BP                 | localization                                                  |
| 1.30E-02   | 102                | GO:0051234   | BP                 | establishment of localization                                 |
| 1.60E-02   | 101                | GO:0006810   | BP                 | transport                                                     |
| 6.67E-06   | 63                 | GO:0006811   | BP                 | ion transport                                                 |
| 2.70E-05   | 38                 | GO:0006812   | BP                 | cation transport                                              |
| 1.02E-06   | 32                 | GO:0015672   | BP                 | monovalent inorganic cation transport                         |
| 1.66E-05   | 33                 | GO:0030001   | BP                 | metal ion transport                                           |
| 8.86E-09   | 25                 | GO:0006814   | BP                 | sodium ion transport                                          |
| 4.66E-02   | 26                 | GO:0034220   | BP                 | ion transmembrane transport                                   |
| 3.60E-02   | 2                  | GO:0000186   | BP                 | activation of MAPKK activity                                  |
| 1.92E-02   | 6                  | GO:0071526   | BP                 | semaphorin-plexin signaling pathway                           |
| 3.60E-02   | 2                  | GO:0032456   | BP                 | endocytic recycling                                           |
| 2.69E-02   | 15                 | GO:0032501   | BP                 | multicellular organismal process                              |
| 4.79E-02   | 10                 | GO:0007275   | BP                 | multicellular organism development                            |
| 4.30E-02   | 4                  | GO:0009617   | BP                 | response to bacterium                                         |
| 4.30E-02   | 4                  | GO:0042742   | BP                 | defense response to bacterium                                 |

**Supplementary Table 9 | GO enrichment analysis of unique gene families in earthworm.**

| Gene ID             | Primer Name | Primer sequence (5' to 3') |
|---------------------|-------------|----------------------------|
| evm.TU.ctg3.9       | ctg3.9_F    | GCAGCCGTTGTGTTTCCAAT       |
|                     | ctg3.9_R    | GACATCTTGCGGTGCAGTTG       |
| evm.TU.ctg982.9     | ctg982.9_F  | GAAGTCCACCTCAGCAGACC       |
|                     | ctg982.9_R  | TGGTTGAGGCTCGATGGTTC       |
| evm.TU.ctg408.9     | ctg408.9_F  | CCCATCAAGTGGTTGGCTCT       |
|                     | ctg408.9_R  | AGGGCTTGTGGAATCTGTCTG      |
| evm.TU.ctg646.3     | ctg646.3_F  | GCGTCAAATCCTCGGCATC        |
|                     | ctg646.3_R  | GCAGTGAACAATCCCCCGTA       |
| evm.TU.ctg683.28    | ctg683.28_F | GATGTCGAATGTGTCGCGTG       |
|                     | ctg683.28_R | GCGGGATCAAGGTAGACGAG       |
| evm.TU.ctg91.63     | ctg91.63_F  | CAAGCATGTGCCGAATCCAG       |
|                     | ctg91.63_R  | CTGTGCACTGTCTGGGACAT       |
| evm.TU.ctg94.37     | ctg94.37_F  | ATCGTTACTCCGACCGATGC       |
|                     | ctg94.37_R  | GAGTTGGTCGCCTCTGTCAA       |
| evm.TU.ctg408.8     | ctg408.8_F  | ATACGATCCGCGAGGTCAAC       |
|                     | ctg408.8_R  | TGCAATTCTTGAGCCCGAT        |
| β-actin (Reference) | β-actin_F   | ACGAAGGTTATGCTCTGCCACAC    |
|                     | β-actin_R   | CTCTTTCGGCTGTCGTCTGTAAG    |

**Supplementary Table 10 | Primers of qPCR for EGFR copies.**

| <b>Gene ID</b>   | <b>Homologues</b> | <b>Symbol</b> | <b>moduleColor</b> | <b>MM.brown</b> | <b>p.MM.brown</b> |
|------------------|-------------------|---------------|--------------------|-----------------|-------------------|
| evm.TU.ctg192.7  | CapteG176110      | MYPH          | brown              | 0.960478678     | 4.36E-17          |
| evm.TU.ctg539.23 | CapteG170504      | FOS           | brown              | 0.958639506     | 8.15E-17          |
| evm.TU.ctg299.5  | CapteG178665      | DYRK2         | brown              | 0.9550762       | 2.54E-16          |
| evm.TU.ctg549.8  | CapteG176380      | GRB10         | brown              | 0.953598537     | 3.95E-16          |
| evm.TU.ctg103.23 | CapteG170392      | FHL2          | brown              | 0.949444432     | 1.28E-15          |
| evm.TU.ctg114.32 | CapteG177478      | PEBB          | brown              | 0.947492433     | 2.15E-15          |
| evm.TU.ctg19.4   | CapteG228569      | MMP14         | brown              | 0.945766874     | 3.34E-15          |
| evm.TU.ctg1175.3 | CapteG197066      | RHG20         | brown              | 0.94349469      | 5.85E-15          |
| evm.TU.ctg837.1  | CapteG186269      |               | brown              | 0.941505506     | 9.38E-15          |
| evm.TU.ctg130.42 | CapteG97875       | SL9A2         | brown              | 0.938900249     | 1.70E-14          |
| evm.TU.ctg683.28 | CapteG226426      | EGFR          | brown              | 0.937991074     | 2.08E-14          |
| evm.TU.ctg142.55 | CapteG156731      | TPM1          | brown              | 0.937583191     | 2.27E-14          |
| evm.TU.ctg423.23 | CapteG171705      | DCMC          | brown              | 0.936693684     | 2.75E-14          |
| evm.TU.ctg127.15 | CapteG215426      | MFS4B         | brown              | 0.93606517      | 3.15E-14          |
| evm.TU.ctg530.3  | CapteG199858      | HUNB          | brown              | 0.934630273     | 4.26E-14          |
| evm.TU.ctg238.49 | CapteG172802      | MEIOC         | brown              | 0.9321239       | 7.10E-14          |
| evm.TU.ctg81.18  | CapteG186269      | DDT4L         | brown              | 0.932031485     | 7.23E-14          |
| evm.TU.ctg72.89  | CapteG50343       | TISB          | brown              | 0.931872398     | 7.47E-14          |
| evm.TU.ctg299.19 | CapteG158933      | KGP1          | brown              | 0.930986019     | 8.90E-14          |
| evm.TU.ctg983.6  | CapteG103587      | SIK3          | brown              | 0.929800071     | 1.12E-13          |
| evm.TU.ctg332.4  | CapteG77182       | SOCS3         | brown              | 0.929140722     | 1.27E-13          |
| evm.TU.ctg588.6  | CapteG171008      | MOT5          | brown              | 0.928653397     | 1.40E-13          |
| evm.TU.ctg296.54 | CapteG226569      | KCNJ6         | brown              | 0.927066609     | 1.88E-13          |
| evm.TU.ctg272.6  | CapteG162250      | S13A2         | brown              | 0.925976198     | 2.30E-13          |
| evm.TU.ctg123.16 | CapteG227995      | GALE          | brown              | 0.92434761      | 3.09E-13          |
| evm.TU.ctg698.2  | CapteG194504      | T151B         | brown              | 0.924292218     | 3.12E-13          |
| evm.TU.ctg302.1  | CapteG195496      | CRERF         | brown              | 0.924020985     | 3.27E-13          |
| evm.TU.ctg210.11 | CapteG198404      |               | brown              | 0.923644255     | 3.50E-13          |
| evm.TU.ctg530.2  | CapteG199858      | HUNB          | brown              | 0.922179135     | 4.52E-13          |
| evm.TU.ctg351.2  | CapteG227359      | REST          | brown              | 0.921760129     | 4.87E-13          |
| evm.TU.ctg1275.5 | CapteG222792      |               | brown              | 0.92130248      | 5.26E-13          |
| evm.TU.ctg359.5  | CapteG169335      | BRD2          | brown              | 0.920181555     | 6.37E-13          |
| evm.TU.ctg32.20  | CapteG220321      | HVCN1         | brown              | 0.918829033     | 7.99E-13          |
| evm.TU.ctg30.33  | CapteG163268      | GDS1A         | brown              | 0.918618546     | 8.28E-13          |
| evm.TU.ctg29.34  | CapteG213150      | FMAR          | brown              | 0.918072125     | 9.06E-13          |
| evm.TU.ctg100.23 | CapteG50343       | TISB          | brown              | 0.917398793     | 1.01E-12          |
| evm.TU.ctg364.3  | CapteG127570      | PDC6I         | brown              | 0.917000979     | 1.08E-12          |
| evm.TU.ctg432.9  | CapteG206255      | HMHA1         | brown              | 0.916193032     | 1.23E-12          |
| evm.TU.ctg499.11 | CapteG226667      | ELL2          | brown              | 0.915855333     | 1.30E-12          |
| evm.TU.ctg3186.1 | CapteG228725      | ATS18         | brown              | 0.913955352     | 1.75E-12          |
| evm.TU.ctg266.72 | CapteG77182       | SOCS3         | brown              | 0.913702247     | 1.82E-12          |
| evm.TU.ctg192.6  | CapteG227370      | TNAP3         | brown              | 0.91354691      | 1.87E-12          |

|                  |              |       |       |             |          |
|------------------|--------------|-------|-------|-------------|----------|
| evm.TU.ctg137.13 | CapteG129833 | SHAN3 | brown | 0.912650687 | 2.15E-12 |
| evm.TU.ctg71.3   |              |       | brown | 0.910865027 | 2.82E-12 |
| evm.TU.ctg745.4  | CapteG105015 | PPM1D | brown | 0.909878695 | 3.27E-12 |
| evm.TU.ctg325.14 |              | ACK1  | brown | 0.90962553  | 3.39E-12 |
| evm.TU.ctg348.2  | CapteG174485 | S23A1 | brown | 0.908604045 | 3.95E-12 |
| evm.TU.ctg72.93  | CapteG220507 | CO6A4 | brown | 0.908395067 | 4.07E-12 |
| evm.TU.ctg975.7  | CapteG174539 | UNC9  | brown | 0.908282468 | 4.14E-12 |
| evm.TU.ctg310.25 | CapteG158679 | ACT2  | brown | 0.90712193  | 4.90E-12 |

**Supplementary Table 11 | Genes in the brown module with a higher intramodule membership during regeneration.** Here, top50 genes with Intramodule membership were showed.

| <b>FDR</b> | <b>Number</b> | <b>term ID</b> | <b>Class</b> | <b>GO Name</b>                                                  |
|------------|---------------|----------------|--------------|-----------------------------------------------------------------|
| 4.99E-02   | 4             | GO:0042558     | BP           | pteridine-containing compound metabolic process                 |
| 2.49E-02   | 10            | GO:0006813     | BP           | potassium ion transport                                         |
| 3.64E-02   | 3             | GO:0046653     | BP           | tetrahydrofolate metabolic process                              |
| 4.03E-02   | 50            | GO:0006796     | BP           | phosphate-containing compound metabolic process                 |
| 8.70E-04   | 37            | GO:0016310     | BP           | phosphorylation                                                 |
| 1.79E-04   | 35            | GO:0006468     | BP           | protein phosphorylation                                         |
| 4.25E-02   | 15            | GO:0007166     | BP           | cell surface receptor signaling pathway                         |
| 4.03E-02   | 5             | GO:0051336     | BP           | regulation of hydrolase activity                                |
| 3.10E-02   | 27            | GO:0071944     | CC           | cell periphery                                                  |
| 3.66E-02   | 26            | GO:0005886     | CC           | plasma membrane                                                 |
| 2.91E-03   | 18            | GO:0044459     | CC           | plasma membrane part                                            |
| 3.10E-03   | 12            | GO:0031226     | CC           | intrinsic component of plasma membrane                          |
| 3.10E-03   | 12            | GO:0005887     | CC           | integral component of plasma membrane                           |
| 4.86E-02   | 6             | GO:0016209     | MF           | antioxidant activity                                            |
| 3.64E-02   | 230           | GO:0003824     | MF           | catalytic activity                                              |
| 1.33E-03   | 75            | GO:0140096     | MF           | catalytic activity, acting on a protein                         |
| 4.00E-02   | 91            | GO:0016740     | MF           | transferase activity                                            |
| 7.56E-05   | 49            | GO:0016772     | MF           | transferase activity, transferring phosphorus-containing groups |
| 3.88E-06   | 44            | GO:0016773     | MF           | phosphotransferase activity, alcohol group as acceptor          |
| 1.38E-05   | 45            | GO:0016301     | MF           | kinase activity                                                 |
| 3.64E-02   | 4             | GO:0003951     | MF           | NAD+ kinase activity                                            |
| 7.56E-05   | 36            | GO:0004672     | MF           | protein kinase activity                                         |
| 2.35E-04   | 18            | GO:0004674     | MF           | protein serine/threonine kinase activity                        |
| 1.99E-02   | 51            | GO:0016491     | MF           | oxidoreductase activity                                         |
| 4.99E-02   | 5             | GO:0016684     | MF           | oxidoreductase activity, acting on peroxide as acceptor         |
| 2.01E-03   | 371           | GO:0005488     | MF           | binding                                                         |
| 3.88E-06   | 179           | GO:0043167     | MF           | ion binding                                                     |
| 3.62E-05   | 98            | GO:0043168     | MF           | anion binding                                                   |
| 2.26E-03   | 82            | GO:0097367     | MF           | carbohydrate derivative binding                                 |
| 3.50E-05   | 99            | GO:0036094     | MF           | small molecule binding                                          |
| 2.35E-04   | 89            | GO:1901265     | MF           | nucleoside phosphate binding                                    |
| 2.48E-03   | 75            | GO:0035639     | MF           | purine ribonucleoside triphosphate binding                      |
| 2.35E-04   | 89            | GO:0000166     | MF           | nucleotide binding                                              |
| 2.26E-03   | 76            | GO:0032553     | MF           | ribonucleotide binding                                          |
| 2.53E-03   | 75            | GO:0017076     | MF           | purine nucleotide binding                                       |
| 1.46E-02   | 60            | GO:0030554     | MF           | adenyl nucleotide binding                                       |
| 2.48E-03   | 75            | GO:0032555     | MF           | purine ribonucleotide binding                                   |
| 1.46E-02   | 60            | GO:0032559     | MF           | adenyl ribonucleotide binding                                   |
| 1.46E-02   | 60            | GO:0005524     | MF           | ATP binding                                                     |
| 4.03E-02   | 9             | GO:0015079     | MF           | potassium ion transmembrane transporter activity                |
| 4.86E-02   | 7             | GO:0022843     | MF           | voltage-gated cation channel activity                           |

**Supplementary Table 12 | GO enrichment analysis of the black module.**



| <b>Gene ID</b>    | <b>Homologue</b> | <b>Symbol</b> | <b>moduleColor</b> | <b>MM.black</b> | <b>p.MM.black</b> |
|-------------------|------------------|---------------|--------------------|-----------------|-------------------|
| evm.TU.ctg1539.1  | CapteG71935      | AGRIN         | black              | 0.927632028     | 1.69E-13          |
| evm.TU.ctg1025.11 | CapteG196162     |               | black              | 0.92156417      | 5.03E-13          |
| evm.TU.ctg413.26  | CapteG210699     |               | black              | 0.916257732     | 1.22E-12          |
| evm.TU.ctg262.27  | CapteG170895     | MOT14         | black              | 0.90865928      | 3.91E-12          |
| evm.TU.ctg81.61   | CapteG126517     | SPHK1         | black              | 0.903903928     | 7.73E-12          |
| evm.TU.ctg1215.3  | CapteG170895     | MOT9          | black              | 0.902516591     | 9.36E-12          |
| evm.TU.ctg343.17  | CapteG219042     | MLXPL         | black              | 0.899589522     | 1.39E-11          |
| evm.TU.ctg150.21  | CapteG71935      | AGRIN         | black              | 0.89904043      | 1.50E-11          |
| evm.TU.ctg433.28  | CapteG160399     |               | black              | 0.893244394     | 3.15E-11          |
| evm.TU.ctg424.4   | CapteG222921     | APLP          | black              | 0.879484608     | 1.57E-10          |
| evm.TU.ctg1974.3  | CapteG228443     | FAT3          | black              | 0.878402065     | 1.77E-10          |
| evm.TU.ctg685.15  |                  | LECT1         | black              | 0.877133362     | 2.03E-10          |
| evm.TU.ctg24.84   | CapteG164804     | PDIA3         | black              | 0.875340018     | 2.46E-10          |
| evm.TU.ctg685.11  |                  | LECT1         | black              | 0.873669394     | 2.93E-10          |
| evm.TU.ctg19.34   | CapteG210005     | S5A3A         | black              | 0.867965255     | 5.25E-10          |
| evm.TU.ctg322.1   | CapteG158885     | SING          | black              | 0.867230292     | 5.65E-10          |
| evm.TU.ctg409.3   | CapteG154368     | ATG2B         | black              | 0.86329124      | 8.29E-10          |
| evm.TU.ctg130.38  | CapteG147868     | KPRA          | black              | 0.856932187     | 1.50E-09          |
| evm.TU.ctg776.2   | CapteG188525     | RFIP2         | black              | 0.851750911     | 2.39E-09          |
| evm.TU.ctg164.59  |                  |               | black              | 0.848179613     | 3.26E-09          |
| evm.TU.ctg3762.1  |                  | LECT1         | black              | 0.846851663     | 3.65E-09          |
| evm.TU.ctg238.36  | CapteG149382     |               | black              | 0.840645498     | 6.12E-09          |
| evm.TU.ctg27.46   | CapteG108481     | PTK7          | black              | 0.83739079      | 7.95E-09          |
| evm.TU.ctg546.9   | CapteG164703     | MYG1          | black              | 0.836889809     | 8.27E-09          |
| evm.TU.ctg396.1   | CapteG216514     | EKI1          | black              | 0.835919894     | 8.93E-09          |
| evm.TU.ctg306.29  | CapteG220701     | MOT12         | black              | 0.834612032     | 9.90E-09          |
| evm.TU.ctg1025.14 | CapteG196162     |               | black              | 0.833229492     | 1.10E-08          |
| evm.TU.ctg485.48  | CapteG221849     | MRF           | black              | 0.831244899     | 1.28E-08          |
| evm.TU.ctg1123.2  | CapteG127905     | S13A3         | black              | 0.83092322      | 1.32E-08          |
| evm.TU.ctg74.69   | CapteG159655     | IQGA1         | black              | 0.826059715     | 1.90E-08          |
| evm.TU.ctg406.56  | CapteG173272     | CCD22         | black              | 0.820860291     | 2.77E-08          |
| evm.TU.ctg2.43    | CapteG98040      | CANA          | black              | 0.81999187      | 2.94E-08          |
| evm.TU.ctg13.44   | CapteG89730      | LIN41         | black              | 0.817579845     | 3.49E-08          |
| evm.TU.ctg299.7   | CapteG171427     | GLCTK         | black              | 0.816461319     | 3.78E-08          |
| evm.TU.ctg156.36  | CapteG177803     | FURIN         | black              | 0.811949762     | 5.15E-08          |
| evm.TU.ctg489.3   | CapteG198861     | FBCDB         | black              | 0.80947754      | 6.08E-08          |
| evm.TU.ctg101.26  | CapteG140091     | THOC1         | black              | 0.808996431     | 6.28E-08          |
| evm.TU.ctg389.2   | CapteG228655     | WDFY2         | black              | 0.807329321     | 7.01E-08          |
| evm.TU.ctg426.23  | CapteG179070     | HIP1          | black              | 0.804359708     | 8.52E-08          |
| evm.TU.ctg305.46  | CapteG100629     | TBC15         | black              | 0.803706772     | 8.89E-08          |
| evm.TU.ctg111.27  | CapteG214729     | STX7          | black              | 0.801541139     | 1.02E-07          |
| evm.TU.ctg1377.4  | CapteG222999     |               | black              | 0.799009101     | 1.20E-07          |

|                  |              |       |       |             |          |
|------------------|--------------|-------|-------|-------------|----------|
| evm.TU.ctg356.10 | CapteG228725 | ATS6  | black | 0.79737091  | 1.33E-07 |
| evm.TU.ctg81.72  |              |       | black | 0.796342163 | 1.42E-07 |
| evm.TU.ctg720.5  | CapteG51996  | MYO3B | black | 0.795927064 | 1.45E-07 |
| evm.TU.ctg1322.3 | CapteG213869 | UBP47 | black | 0.793332004 | 1.71E-07 |
| evm.TU.ctg10.8   | CapteG227168 | AAPK2 | black | 0.793247943 | 1.71E-07 |
| evm.TU.ctg423.26 | CapteG120325 | NRG   | black | 0.790854189 | 1.98E-07 |
| evm.TU.ctg575.9  | CapteG186677 | TBCD9 | black | 0.789513631 | 2.15E-07 |

**Supplementary Table 13 | Genes in the black module with a higher intramodule membership during regeneration.** Here, top 50 genes with positive intramodule membership were showed.

|                            | <b>Numerical value</b> |
|----------------------------|------------------------|
| Estimated Number of Cells  | 2,080                  |
| Fraction Reads in Cells    | 57.10%                 |
| Mean Reads per Cell        | 200,874                |
| Median Genes per Cell      | 493                    |
| Total Genes Detected       | 21,878                 |
| Median UMI Counts per Cell | 1,904                  |

**Supplementary Table 14 | Data quality statistics for single-cell RNA-sequencing.**

### Supplementary References

1. McMillan, E.L., Kamps, A.L., Lake, S.S., Svendsen, C.N. & Bhattacharyya, A. Gene expression changes in the MAPK pathway in both Fragile X and Down syndrome human neural progenitor cells. *Am J Stem Cells* **1**, 154-162 (2012).
2. Chan, S.F., Huang, X., McKercher, S.R., Zaidi, R., Okamoto, S.I., Nakanishi, N. *et al* Transcriptional profiling of MEF2-regulated genes in human neural progenitor cells derived from embryonic stem cells. *Genom Data* **3**, 24-27 (2015).
3. Ning, H., Lin, G, Lue, T.F. & Lin, C.S. Neuron-like differentiation of adipose tissue-derived stromal cells and vascular smooth muscle cells. *Differentiation* **74**, 510-518 (2006).
