# Supplementary material for: Genome and single-cell RNA-sequencing of the earthworm Eisenia andrei identifies cellular mechanisms underlying regeneration
Source: PubMed Central journal article supplement (PMC7253469; doi:10.1038/s41467-020-16454-8), 2020-05-27
Supplement: 41467_2020_16454_MOESM9_ESM.pdf [file 41467_2020_16454_MOESM9_ESM.pdf]

**Title:** Supplementary Data 1.

**Description:** Overlapping of enriched functional categories for differentially expressed up-regulated genes across regenerative stages.

**Title:** Supplementary Data 2.

**Description:** Statistics of transposable elements in five invertebrate genomes.

**Title:** Supplementary Data 3.

**Description:** GO enrichment analysis of 2776 significantly expanded gene families in earthworm.

**Title:** Supplementary Data 4.

**Description:** GO enrichment analysis of the brown module.

**Title:** Supplementary Data 5.

**Description:** GO enrichment analysis of the red module.

**Title:** Supplementary Data 6.

**Description:** GO enrichment analysis of the blue module.
